# Supplementary material for: Splicing modulators act at the branch point adenosine binding pocket defined by the PHF5A–SF3b complex
Source: PubMed Central journal article supplement (PMC5458519; doi:10.1038/ncomms15522), 2017-05-25
Supplement: ncomms15522-s1.pdf [file ncomms15522-s1.pdf]

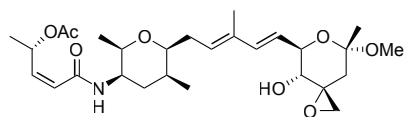

Spliceostatin A

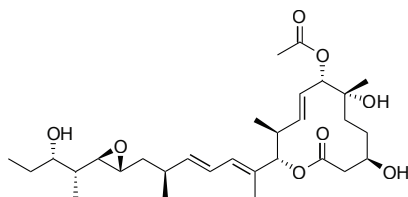

Pladienolide B

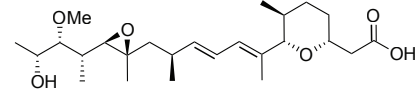

Herboxidiene

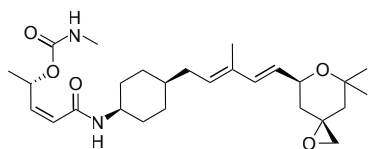

Sudemycin D6

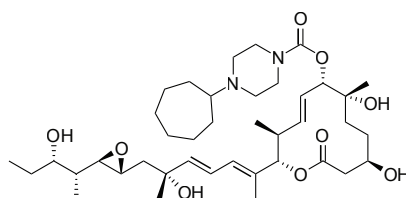

E7107

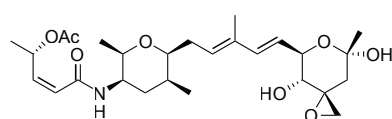

FR901464

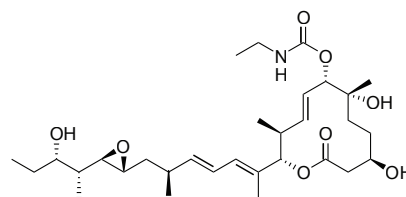

<sup>3</sup>H labelled Pladienolide derivative

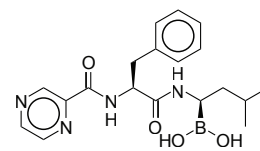

Bortezomib

**Supplementary Figure 1:** Structure of splicing-modulating small molecule compounds and a proteasome inhibitor bortezomib.



20nM Herboxidiene resistant clone#3  
PHF5A residue 36  
WT = TAT= Tyrosine  
Mut = TGT = Cysteine

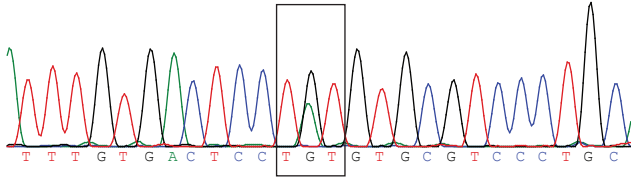

20nM Herboxidiene resistant clone#5  
PHF5A residue 36  
WT = TAT= Tyrosine  
Mut = TGT = Cysteine

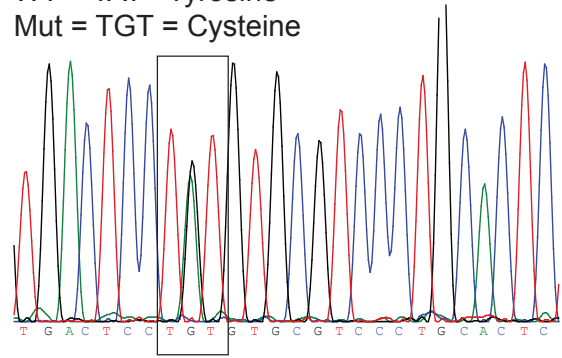

20nM Herboxidiene resistant clone#6  
SF3B1 residue 1074  
WT = CGT = Arginine  
Mut = CAT = Histidine

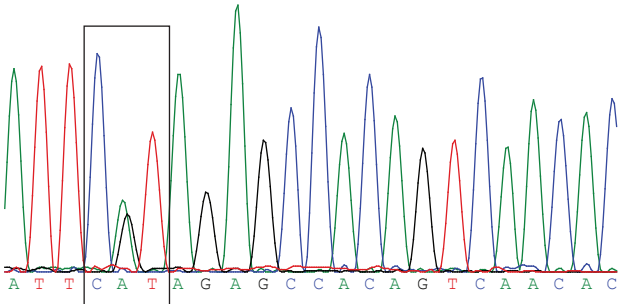

20nM Herboxidiene resistant clone#8  
SF3B1 residue 1078  
WT = GTC = Valine  
Mut = GCC = Alanine

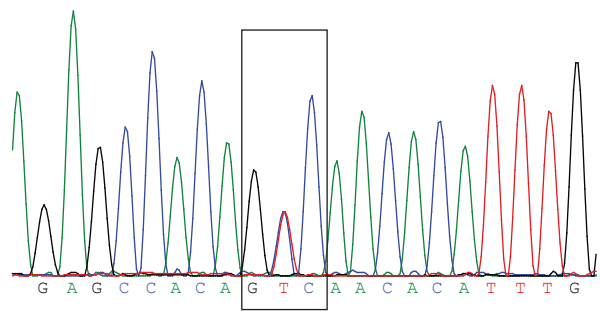

Additional 20nM Herboxidiene resistant line  
(Mixed Population)

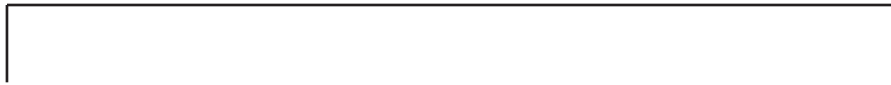

PHF5A residue 36  
WT = TAT= Tyrosine  
Mut = TGT = Cysteine

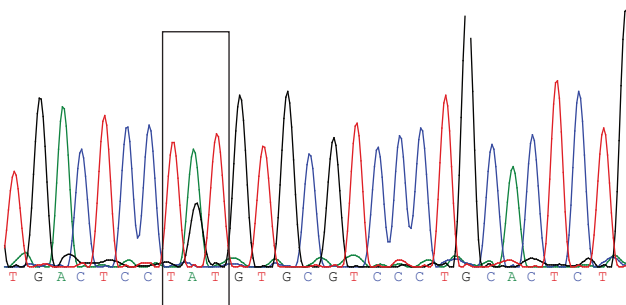

SF3B1 residue 1071  
WT = AAG= Lysine  
Mut = GAG = Glutamic Acid

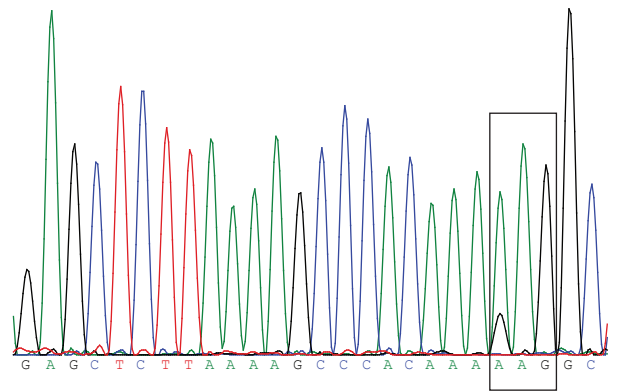

**Supplementary Figure 2:** Targeted Sanger sequencing of resistant clones (continued). Black box indicates affected codons, the respective coding and amino acid change were shown above sequencing results.

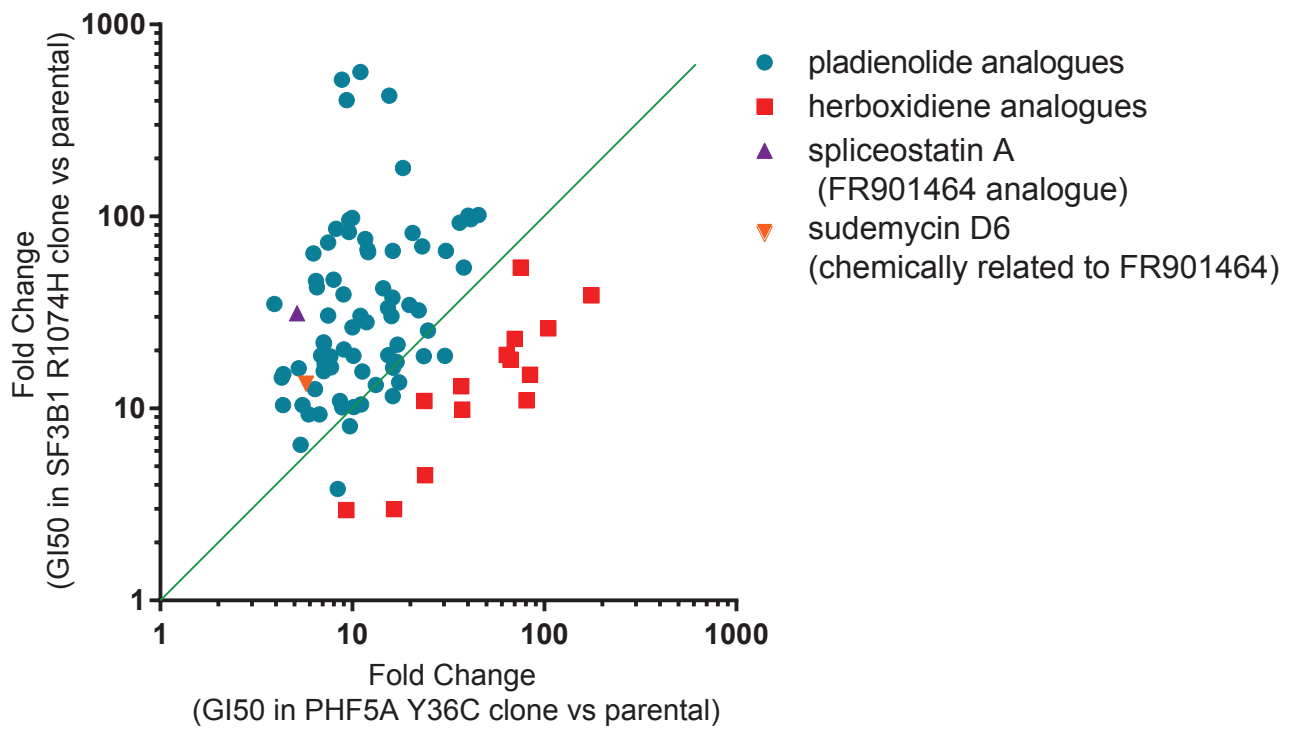

**Supplementary Figure 3:** PHF5A Y36C presents better resistance to herboxidiene analogues than pladienolide and FR901464 analogues whereas SF3B1 R1074H mutation presents with the opposite preference. X-axis is the GI50 ratios between the PHF5A Y36C mutation carrying clone versus the parental line of the same compound in logarithm scale. Y-axis is the GI50 ratios between the SF3B1 R1074H mutation carrying clone versus the parental line in logarithm scale. Green line is at 45° diagonal representing equal GI50 shift of the same compound in both resistant clones as compared to the parental line.



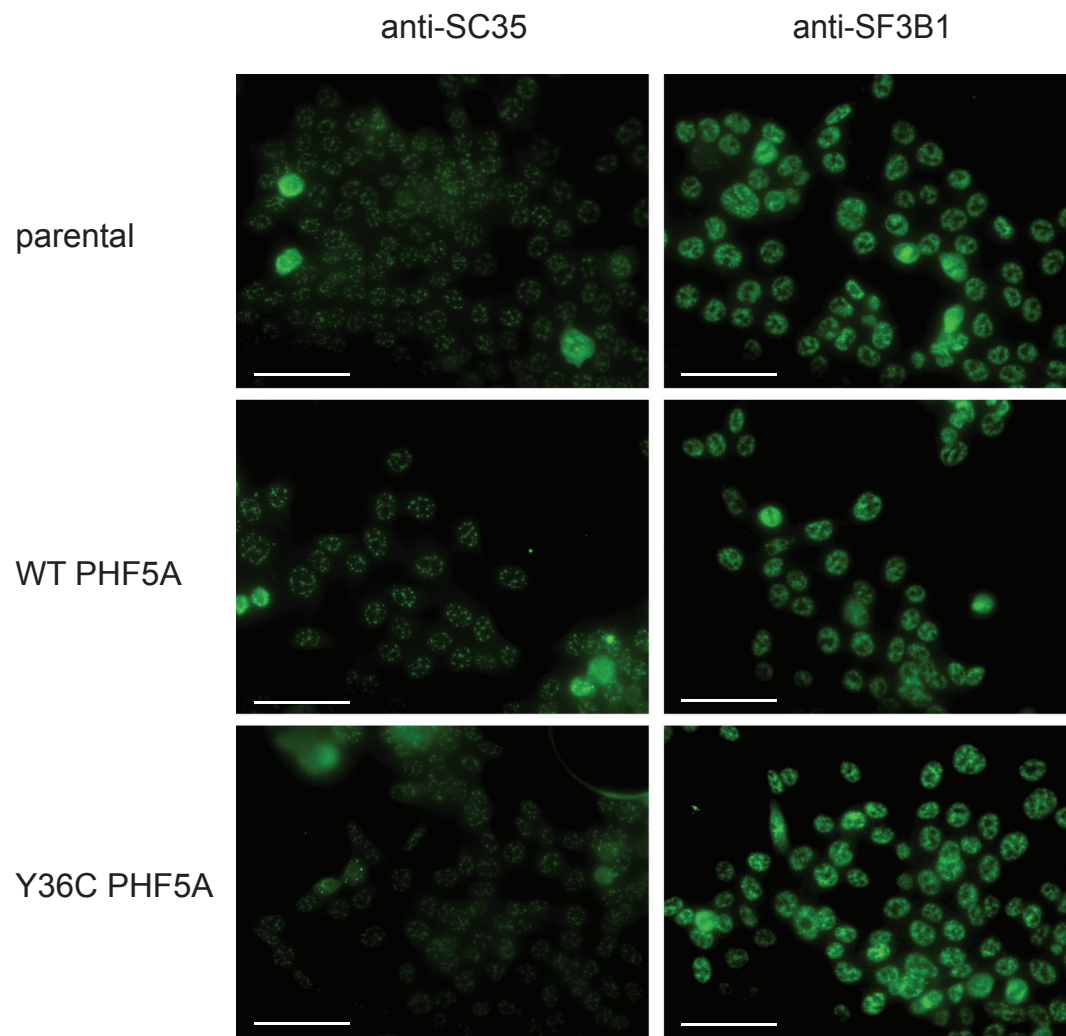

**Supplementary Figure 4:** Expression of PHF5A Y36C does not impact nuclear speckles formation or SF3B1 localization. Nuclear speckles were immuno-stained with anti-SC35 antibody. All scale bars indicate 50 $\mu$ M length.

### Replicate 1

#### Wild Type – PHF5A

| Description | Coverage(%) | # Peptides | MW [kDa] |
|-------------|-------------|------------|----------|
| SF3B1       | 61          | 73         | 145.7    |
| SF3B2       | 52          | 46         | 100.2    |
| SF3B3       | 58          | 58         | 135.5    |
| SF3B5       | 46          | 2          | 10.1     |
| SF3B6/P14   | 54          | 8          | 14.6     |
| PHF5A       | 22          | 3          | 12.4     |

#### Mutant (Y36C) – PHF5A

| Description | Coverage(%) | # Peptides | MW [kDa] |
|-------------|-------------|------------|----------|
| SF3B1       | 60          | 62         | 145.7    |
| SF3B2       | 40          | 34         | 100.2    |
| SF3B3       | 47          | 40         | 135.5    |
| SF3B5       | 70          | 4          | 10.1     |
| SF3B6/P14   | 43          | 6          | 14.6     |
| PHF5A       | 30          | 4          | 12.4     |

### Replicate 2

#### Wild Type – PHF5A

| Description | Coverage(%) | # Peptides | MW [kDa] |
|-------------|-------------|------------|----------|
| SF3B1       | 62          | 70         | 145.7    |
| SF3B2       | 48          | 39         | 100.2    |
| SF3B3       | 54          | 53         | 135.5    |
| SF3B6/P14   | 50          | 5          | 14.6     |
| PHF5A       | 40          | 3          | 12.4     |

#### Mutant (Y36C) – PHF5A

| Description | Coverage(%) | # Peptides | MW [kDa] |
|-------------|-------------|------------|----------|
| SF3B1       | 63          | 67         | 145.7    |
| SF3B2       | 53          | 42         | 100.2    |
| SF3B3       | 57          | 56         | 135.5    |
| SF3B6/P14   | 50          | 5          | 14.6     |
| PHF5A       | 20          | 2          | 12.4     |

**Supplementary Figure 5:** PHF5A Y36C does not change the composition of SF3b complex. Mass spectrometry analysis of SF3b complex proteins from SF3B1 pull-down from respective nuclear extract lysates, replicate 1 come from the same samples used for Fig. 2c and parallel samples from Supplementary Fig 13.

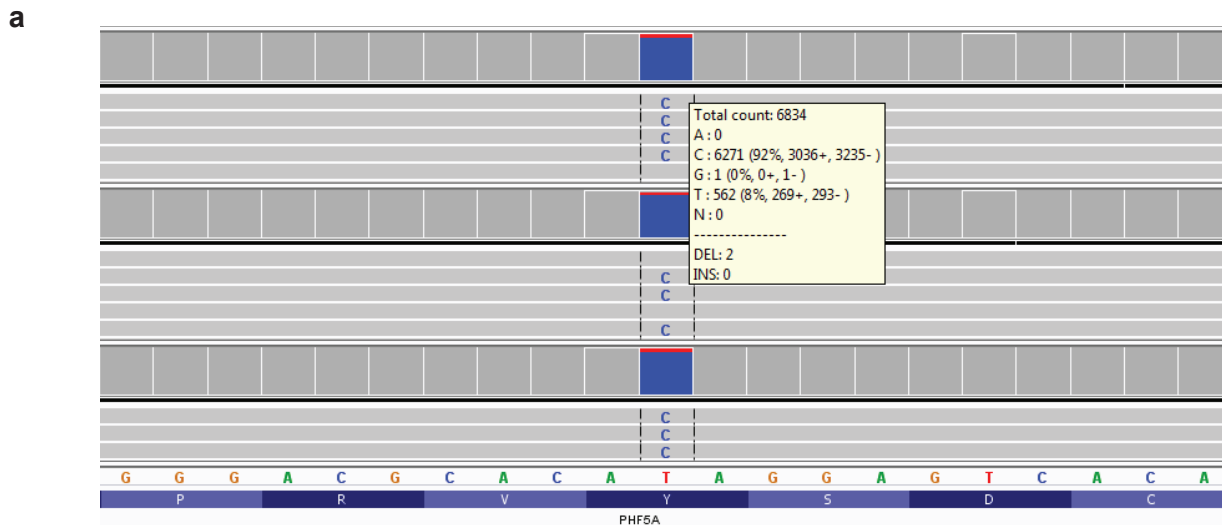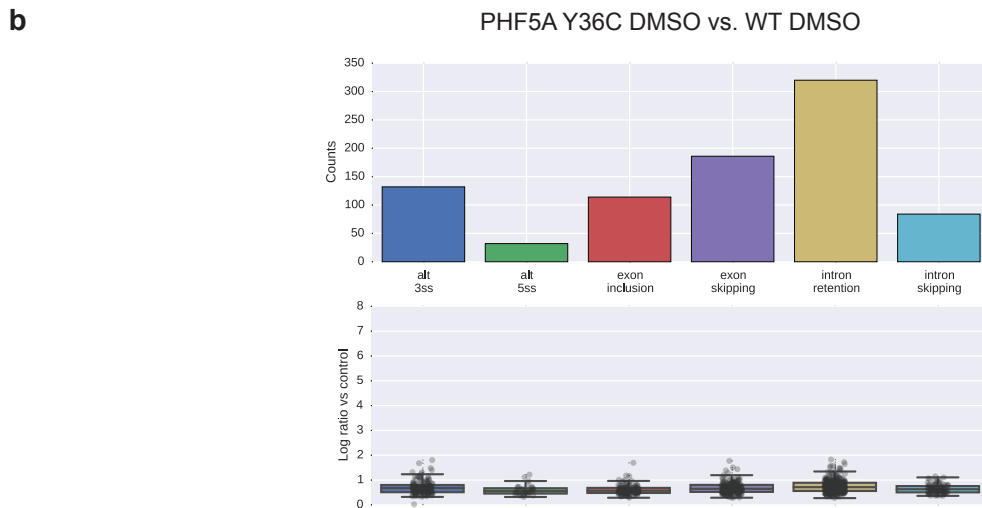

**Supplementary Figure 6:** PHF5A Y36C does not significantly impact global splicing. (a) Y36C PHF5A accounts for ~92% of total PHF5A mRNA expression in the engineered PHF5A Y36C over-expressing lines. Screenshot from IGV browser is shown. Note the sequence below is of reverse complimentary and the T to C conversion is corresponding to tyrosine to cysteine change. (b) QC summary of differential splicing analysis between PHF5A Y36C cells treated with DMSO versus that of PHF5A WT cells showed minimal difference between two genotypes as measured by number of events and average fold change. Box shows the inter-quartile range (IQR) of the dataset whereas the whiskers illustrate 1.5xIQR. QC summary of parallel splicing modulator treated samples can be found in Fig. 4 for comparison.

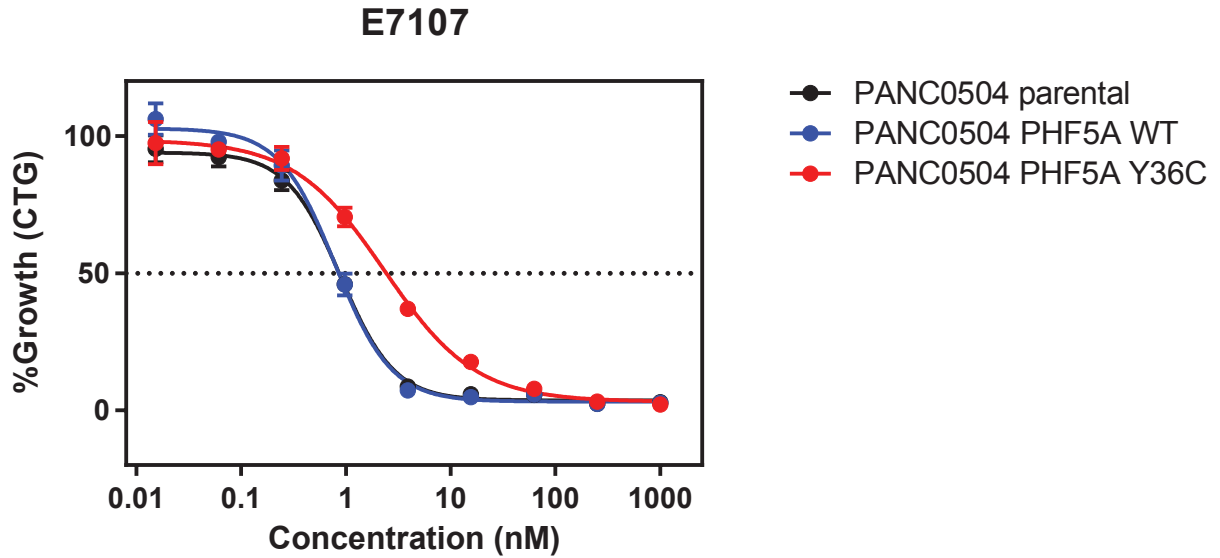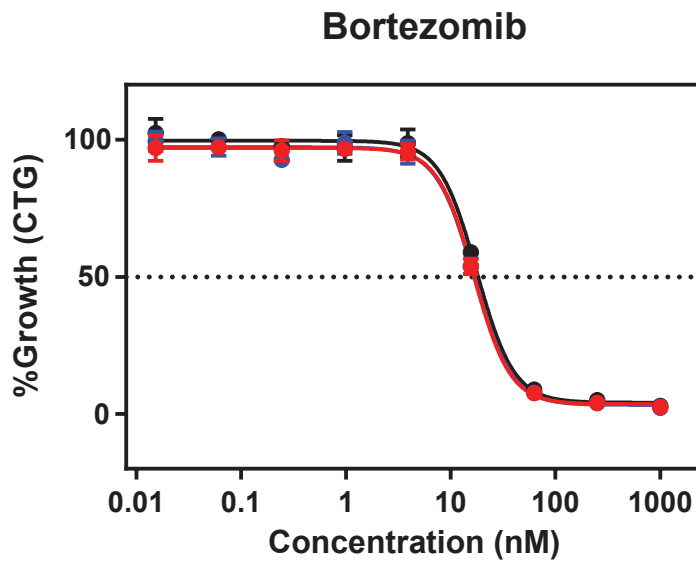

**Supplementary Figure 7:** PHF5A Y36C over-expression in PANC0504 cells shows partial resistant phenotype to splicing modulator E7107 but not proteasome inhibitor Bortezomib. Error bar indicates standard deviation, n=3.

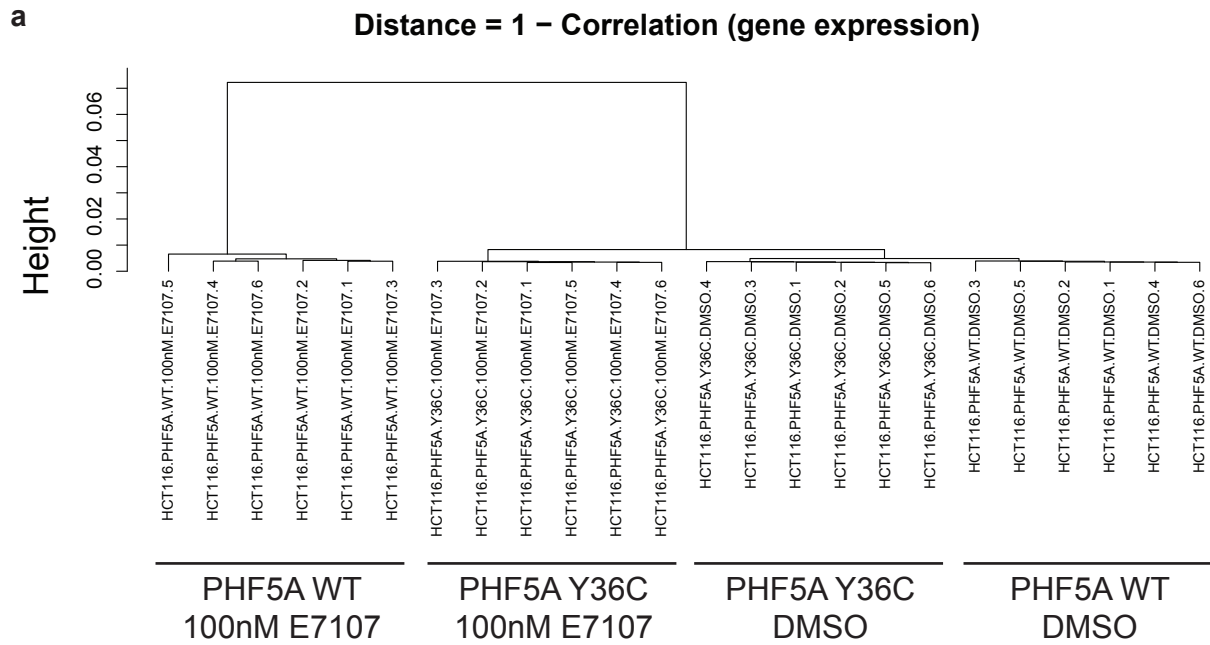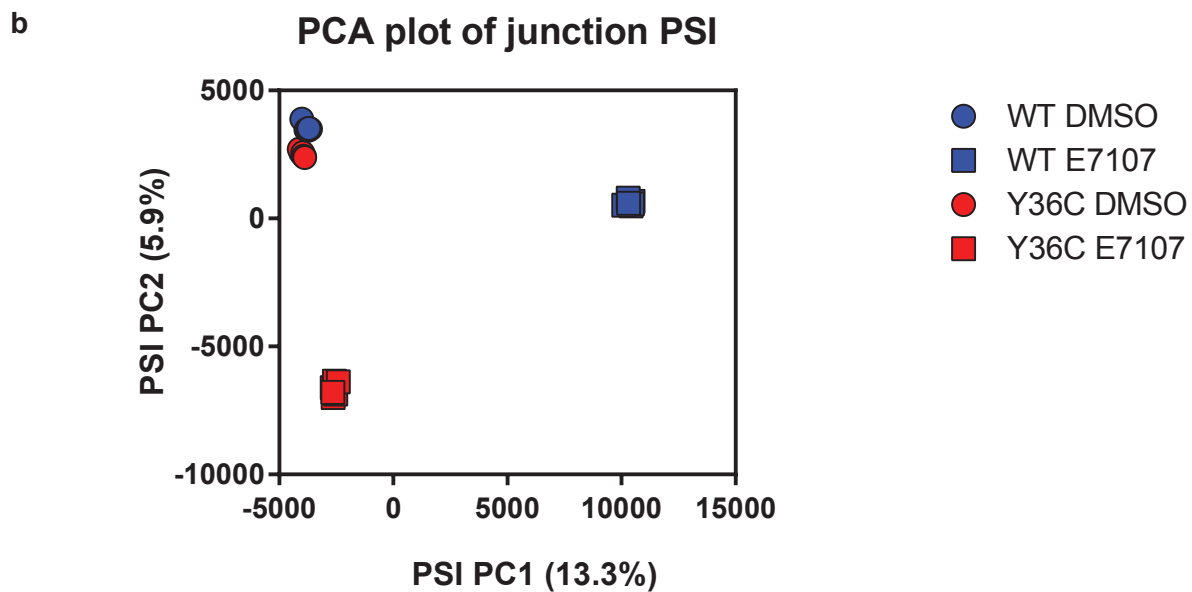

**Supplementary Figure 8:** QC summary of whole transcriptome RNA-seq analyses. (a) Unsupervised clustering of gene expression from the RNA-seq samples. (b) Principle component plot of splicing junction PSI (percent spliced in) from the RNA-seq samples.

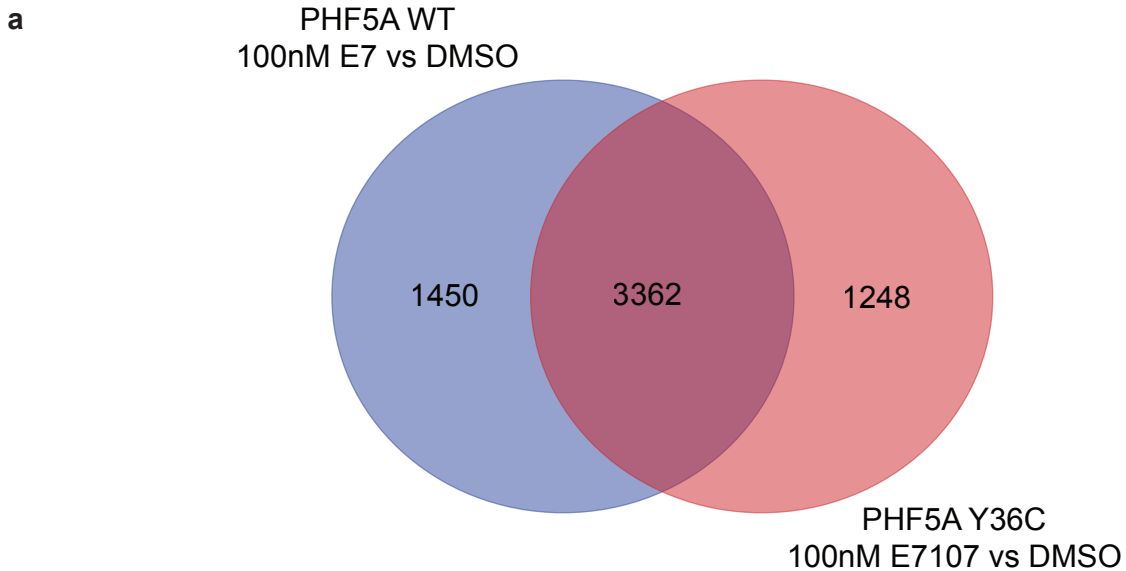

**b PHF5A WT (100nM E7 vs DMSO) specific**

| Gene Set Name                 | # Genes in Gene Set (K) | # Genes in Overlap (k) | k/K    | p-value  | FDR q-value |
|-------------------------------|-------------------------|------------------------|--------|----------|-------------|
| KEGG_RIBOSOME                 | 88                      | 23                     | 0.2614 | 7.23E-16 | 1.35E-13    |
| KEGG_HUNTINGTONS_DISEASE      | 185                     | 25                     | 0.1351 | 2.71E-10 | 1.82E-08    |
| KEGG_PATHWAYS_IN_CANCER       | 328                     | 34                     | 0.1037 | 2.93E-10 | 1.82E-08    |
| KEGG_MAPK_SIGNALING_PATHWAY   | 267                     | 30                     | 0.1124 | 4.69E-10 | 2.18E-08    |
| KEGG_SPLICEOSOME              | 128                     | 20                     | 0.1562 | 1.24E-09 | 4.60E-08    |
| KEGG_RNA_POLYMERASE           | 29                      | 10                     | 0.3448 | 5.73E-09 | 1.78E-07    |
| KEGG_CHRONIC_MYELOID_LEUKEMIA | 73                      | 14                     | 0.1918 | 2.54E-08 | 5.98E-07    |
| KEGG_BLADDER_CANCER           | 42                      | 11                     | 0.2619 | 2.58E-08 | 5.98E-07    |
| KEGG_PYRIMIDINE_METABOLISM    | 98                      | 16                     | 0.1633 | 2.89E-08 | 5.98E-07    |
| KEGG_ALZHEIMERS_DISEASE       | 169                     | 20                     | 0.1183 | 1.52E-07 | 2.83E-06    |

**c PHF5A Y36C (100nM E7 vs DMSO) specific**

| Gene Set Name                         | # Genes in Gene Set (K) | # Genes in Overlap (k) | k/K    | p-value  | FDR q-value |
|---------------------------------------|-------------------------|------------------------|--------|----------|-------------|
| KEGG_RENAL_CELL_CARCINOMA             | 70                      | 14                     | 0.2    | 3.46E-09 | 3.35E-07    |
| KEGG_REGULATION_OF_ACTIN_CYTOSKELETON | 216                     | 24                     | 0.1111 | 3.60E-09 | 3.35E-07    |
| KEGG_MAPK_SIGNALING_PATHWAY           | 267                     | 26                     | 0.0974 | 1.33E-08 | 8.22E-07    |
| KEGG_ALZHEIMERS_DISEASE               | 169                     | 20                     | 0.1183 | 2.45E-08 | 9.88E-07    |
| KEGG_UBIQUITIN_MEDIATED_PROTEOLYSIS   | 138                     | 18                     | 0.1304 | 2.66E-08 | 9.88E-07    |
| KEGG_PURINE_METABOLISM                | 159                     | 19                     | 0.1195 | 4.64E-08 | 1.44E-06    |
| KEGG_HUNTINGTONS_DISEASE              | 185                     | 20                     | 0.1081 | 1.12E-07 | 2.96E-06    |
| KEGG_LYSOSOME                         | 121                     | 16                     | 0.1322 | 1.28E-07 | 2.99E-06    |
| KEGG_PYRIMIDINE_METABOLISM            | 98                      | 14                     | 0.1429 | 2.95E-07 | 6.10E-06    |
| KEGG_PARKINSONS_DISEASE               | 133                     | 16                     | 0.1203 | 4.79E-07 | 8.91E-06    |

**Supplementary Figure 9:** Gene level analysis of splicing modulator regulated genes. (a) Venn Diagram showing the overlap of genes regulated by 100nM E7107 as compared to DMSO in PHF5A WT cells (purple) and genes regulated by 100nM E7107 in Y36C (pink) cells. (b) Gene Set Enrichment Analysis (GSEA) using the Kyoto Encyclopedia of Genes and Genomes (KEGG) pathway database of PHF5A WT specific genes identified from (a). (c) GSEA using KEGG pathway database of PHF5A Y36C specific genes identified from (a). Only the top ten enriched pathways were shown in (b) and (c). Raw data used for generation of (a)(b)(c) were included as supplementary Table 6.

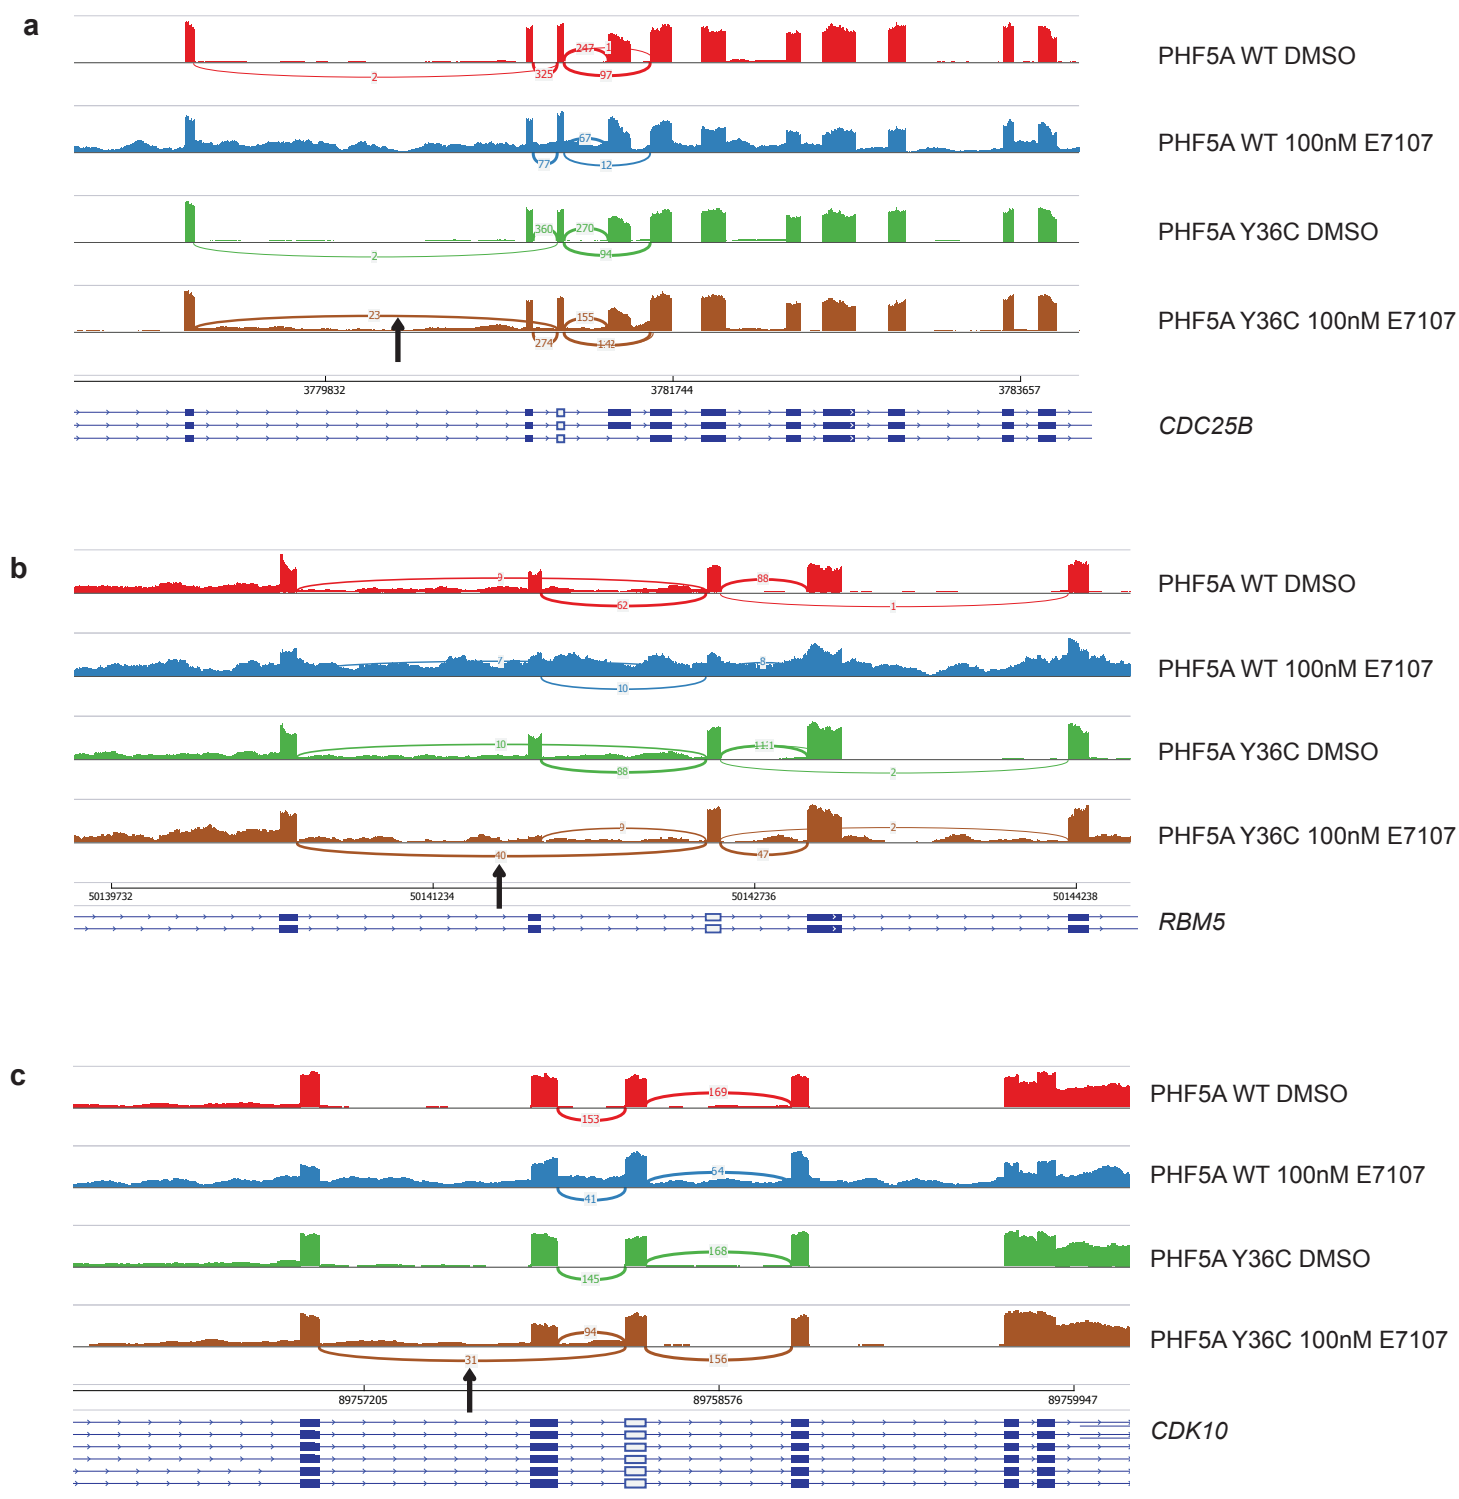

**Supplementary Figure 10:** Sashimi plots of representative gene junctions showing an intron-retention to exon-skipping event switch under E7107 treatment in PHF5A Y36C cells as compared to PHF5A WT cells. (a) *CDC25B*, (b) *RBM5*, (c) *CDK10*, arrow indicates the affected junction, only RNAseq reads splitting between affected junctions were shown.

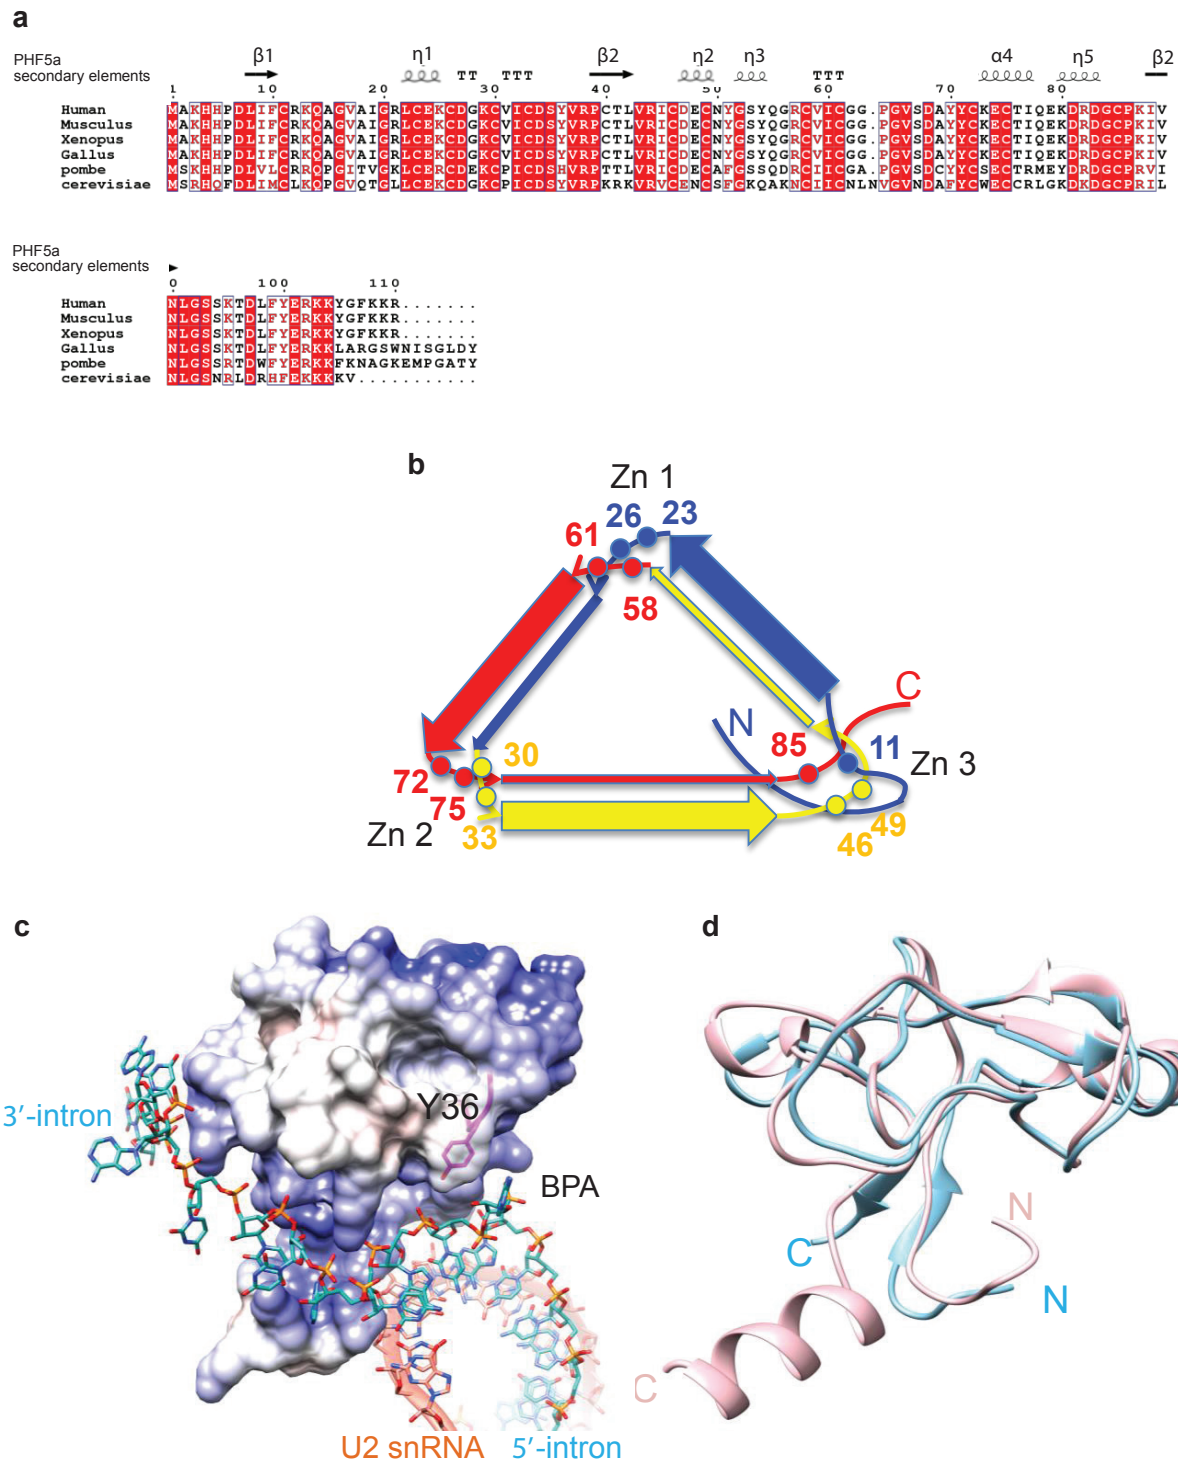

**Supplementary Figure 11:** (a) Sequence alignment of PHF5A. Strict identity are in white on a red background and similarity score higher than 0.2 are colored in red and framed in blue. The rest are weakly similar. ( $\alpha$ : helix,  $\beta$ : strands,  $\eta$ : 310 helix, T: turn) (b) Topology diagram representing a simple view of the triangular shape of PHF5A. An arrow represents 10 residues composing a side of triangles. Large arrows are the peptides closer to viewers and small arrows are away from viewers. Every 20 residues make two arrows and are colored in blue, yellow, red sequentially. Each vertex has a zinc ion coordinated with four cysteines and cysteines are shown as balls. (c) Surface view PHF5A model (Y36 in pink sticks) zoomed in to the interface of Rds3 and intron RNA (cyan sticks). (d) Superimposition of PHF5A (light blue) and Rds3 (pink).



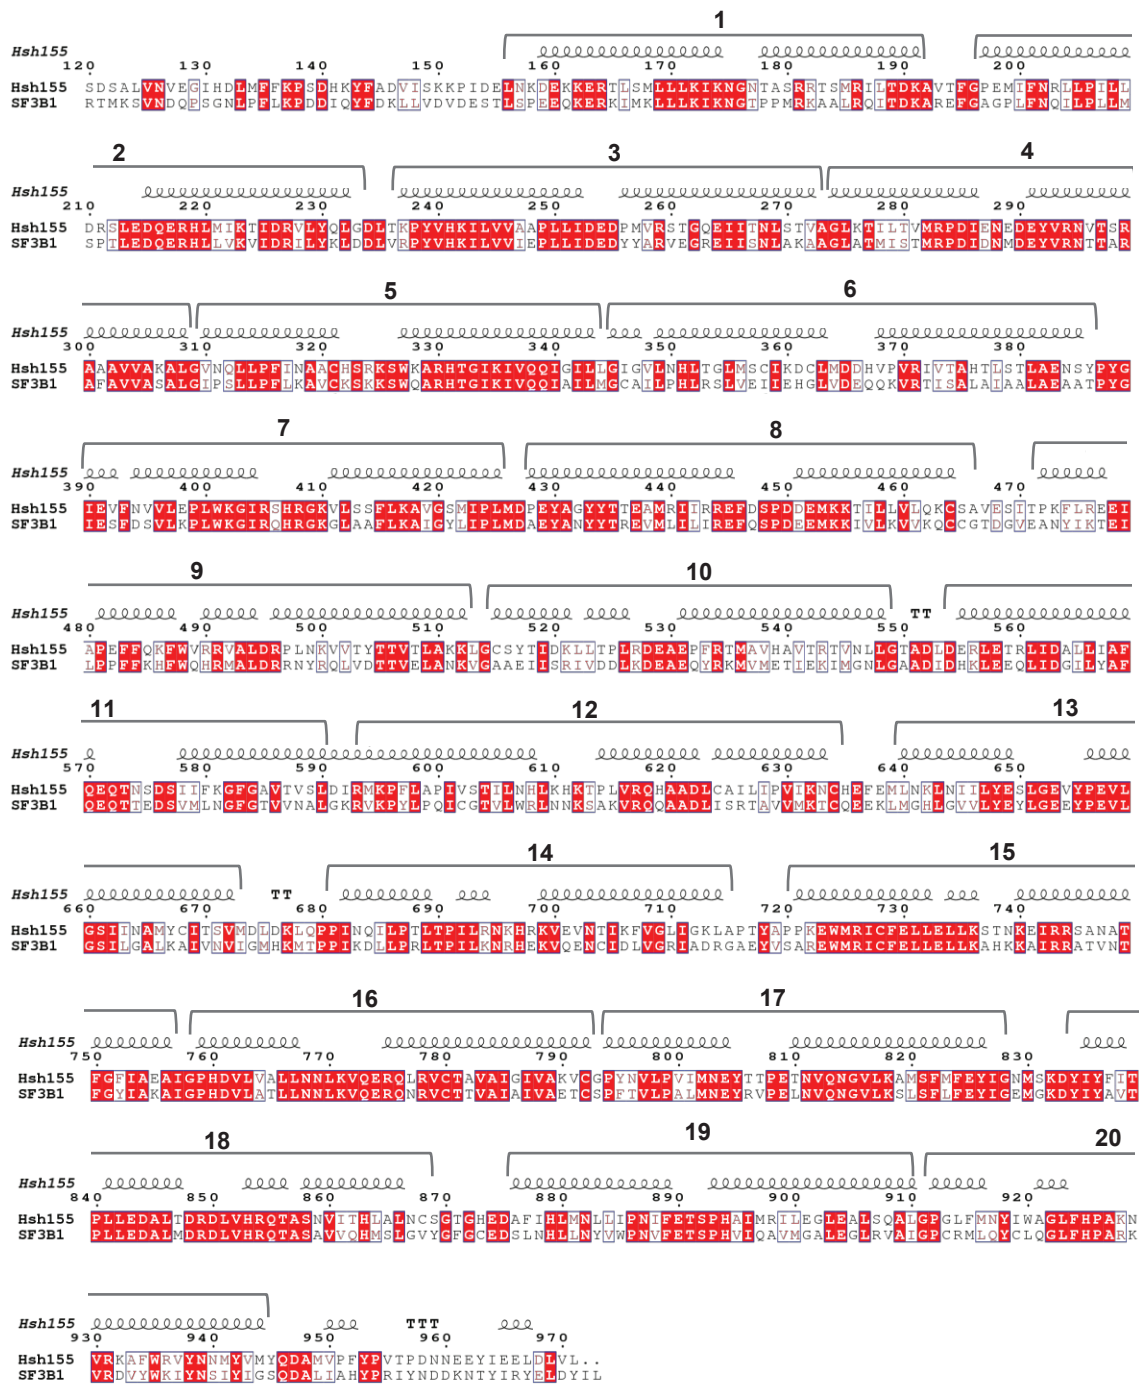

Supplementary Figure 12: Sequence alignment of yeast Hsh155 and human SF3B1.

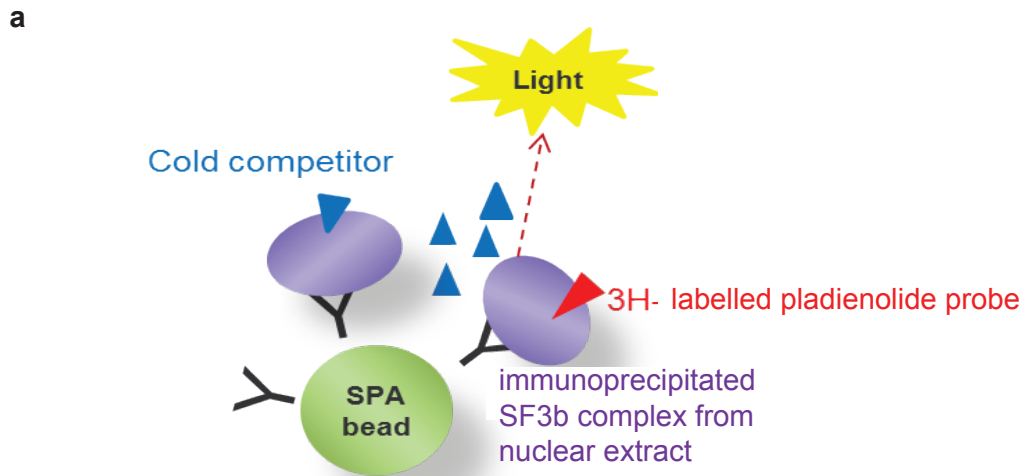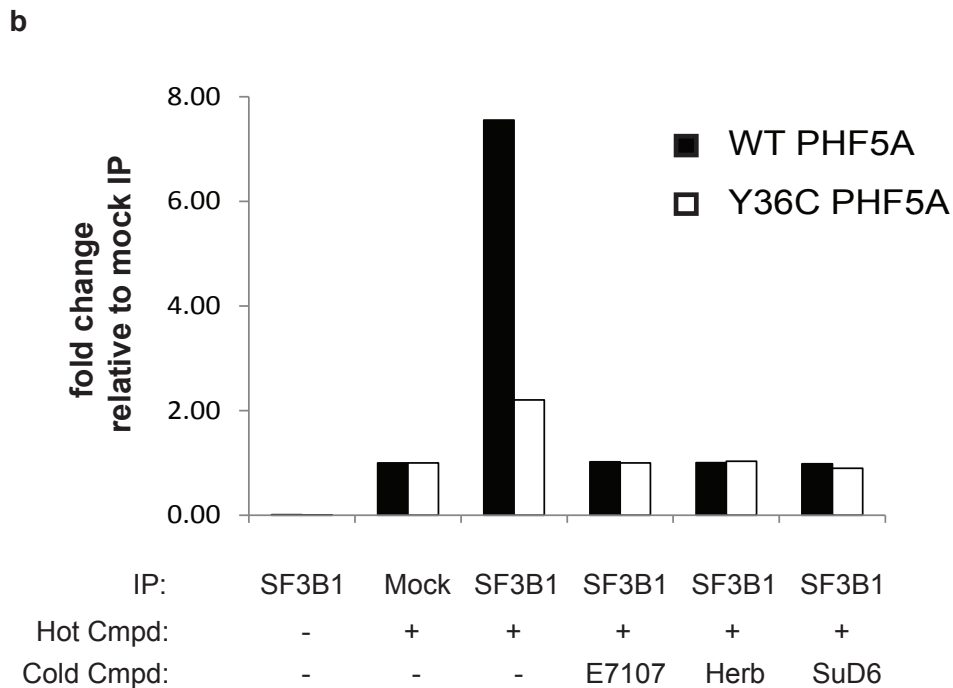

**Supplementary Figure 13:** PHF5A Y36C reduced splicing modulator's affinity to immunoprecipitated SF3b complex. (a) Scheme of the Scintillation Proximity Assay (SPA). (b) Scintillation Proximity Assay of the <sup>3</sup>H-labelled pladienolide analogue (10nM) binding to anti-SF3B1 or mock immunoprecipitated SF3b complex from nuclear extracts containing WT or Y36C PHF5A. Pre-treatment of unlabeled compounds (10 $\mu$ M) were included when indicated.

### WT PHF5A cells

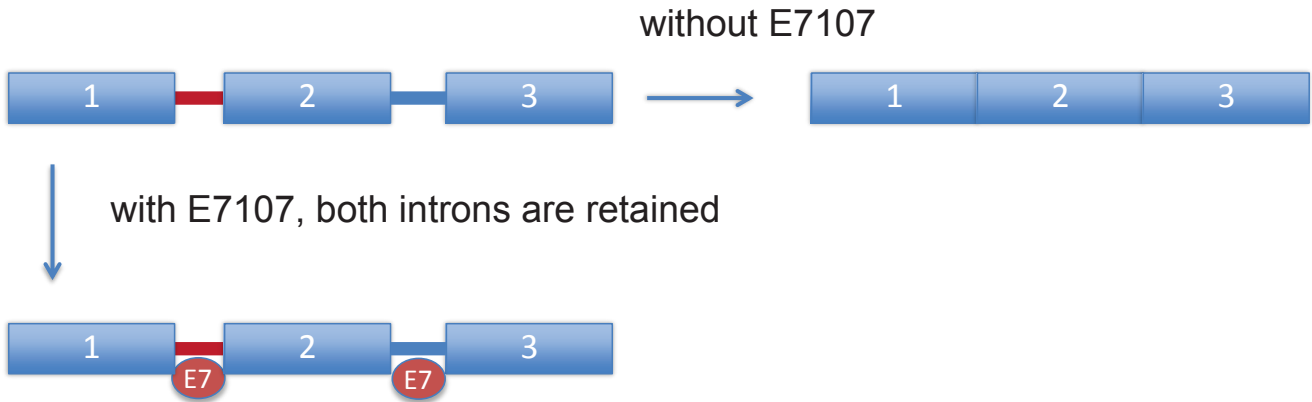

### Y36C PHF5A cells

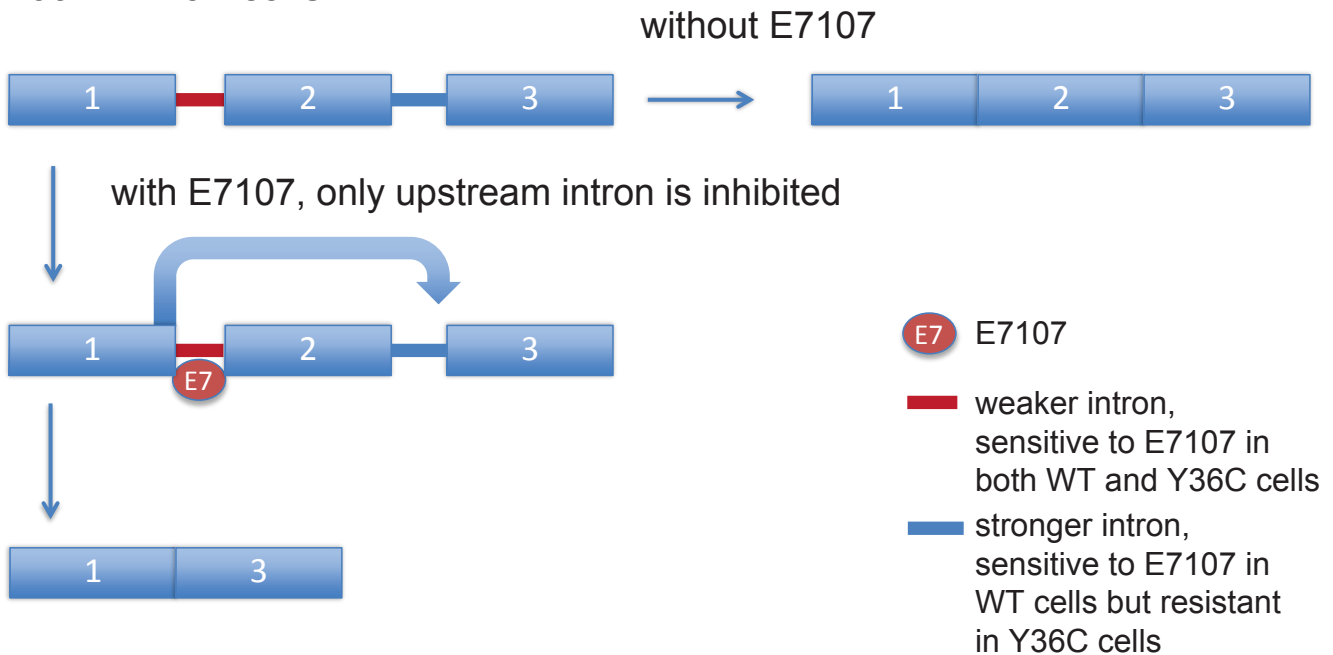

**Supplementary Figure 14:** Hypothetical model for *MCL1* like “exon - weaker intron - exon- stronger intron - exon” structure which underwent IR/ES switch determined by the genotype of PHF5A upon E7107 treatment. In the absence of E7107 treatment, in PHF5A WT and Y36C cells, both introns are recognized by spliceosome leading to production of mature mRNAs. In PHF5A WT cells, both introns are sensitive to E7107 leading to IR of both introns. However, in PHF5A Y36C cells as the association of the compound with the PHF5A-SF3B1 interface is reduced, E7107 would become less efficient in the competition with the downstream, stronger intron while maintaining its inhibition with the upstream, weaker intron. Therefore, spliceosome would be able to recognize the 3' splice site of the downstream stronger intron and lead to direct ligation of exon 1 to exon 3.

**Figure 2a**

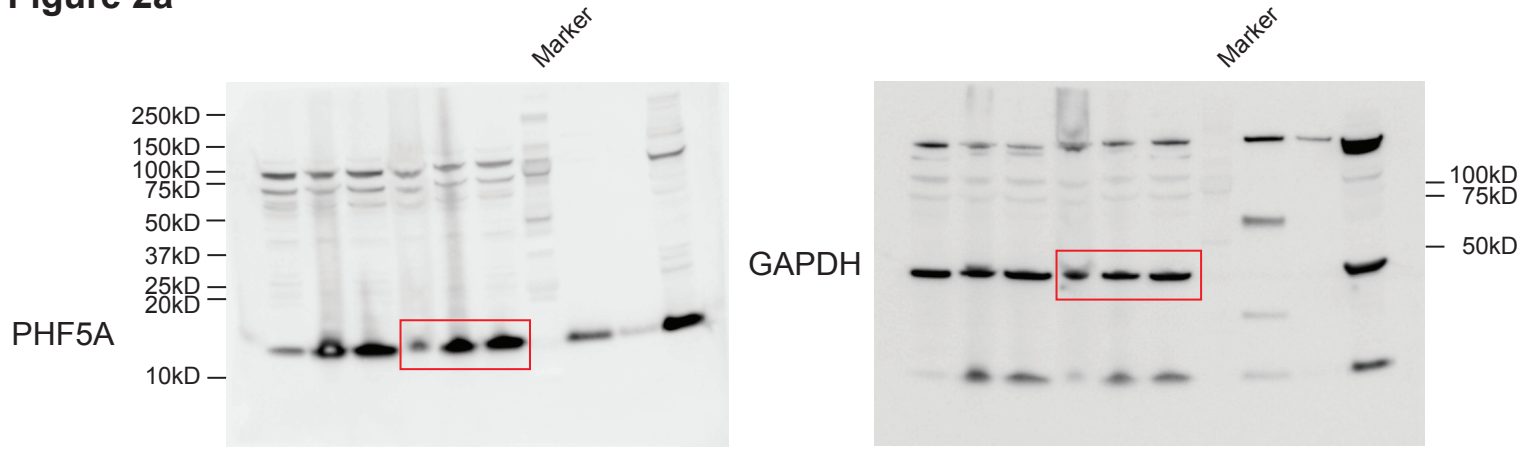

**Figure 2c**

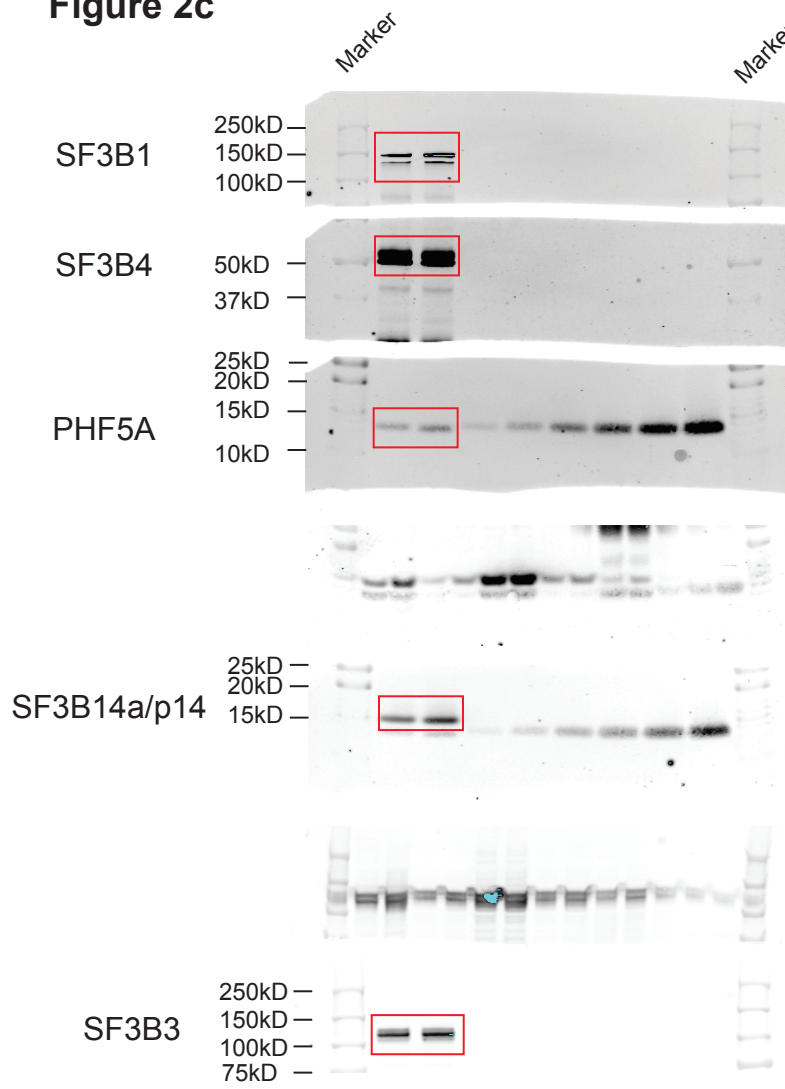

**Figure 7a**

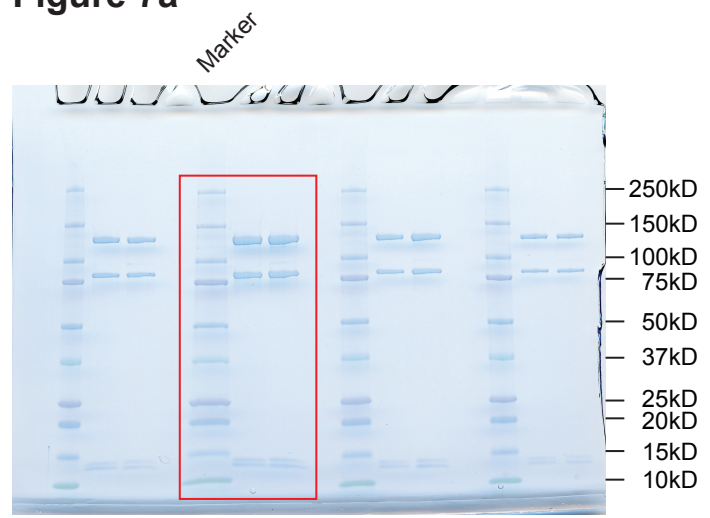

**Figure 7e**

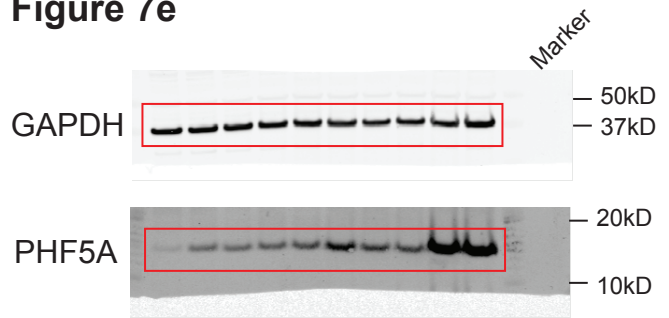

**Supplementary Figure 15:** Uncropped western blot and gel images. Cropped region shown in indicated main figures are highlighted with red box.

## E7107: LC/MS, Purity: 100%

E7107: MS  $C_{40}H_{66}N_2O_9$  (M+H)<sup>+</sup>  
Calculated 719.48, Actual 719.74.

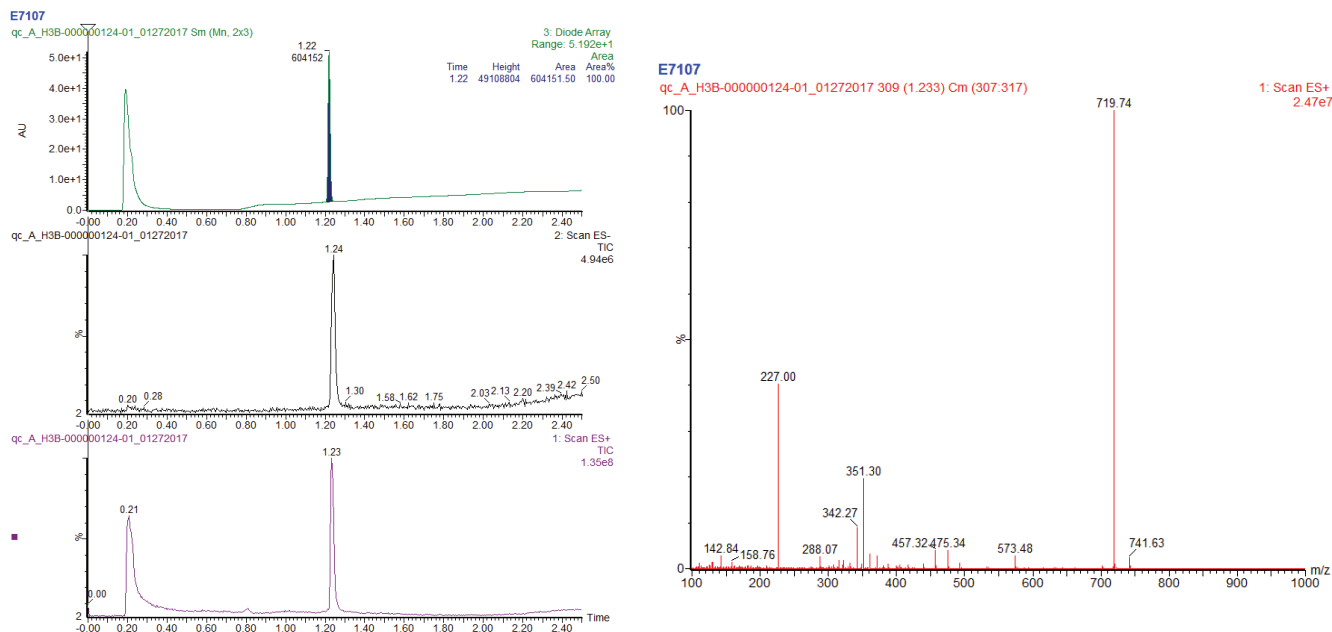

## E7107: <sup>1</sup>H-NMR

<sup>1</sup>H NMR (400 MHz, C<sub>5</sub>D<sub>5</sub>N) δ 0.82 (d, J=6.78 Hz, 3H) 1.04 (t, J=7.34 Hz, 3H) 1.13 (d, J=6.90 Hz, 3H) 1.22-1.30 (m, 4H) 1.33-1.42 (m, 4H) 1.47-1.56 (m, 3H) 1.54 (s, 3H) 1.59 (s, 3H) 1.59-1.66 (m, 3H) 1.68-1.70 (m, 1H) 1.72-1.75 (m, 1H) 1.73 (s, 3H) 1.78-1.84 (m, 1H) 1.93 (dd, J=13.68, 6.53 Hz, 1H) 1.95-1.99 (m, 1H) 2.11 (m, 1H) 2.23 (dd, J=13.68, 5.14 Hz, 1H) 2.27 (br s, 4H) 2.38 (m, 1H) 2.65 (m, 1H) 2.68 (m, 1H) 2.73 (dd, J=14.04, 4.04 Hz, 1H) 3.09 (dd, J=7.65, 2.13 Hz, 1H) 3.32-3.37 (m, 1H) 3.57 (br s, 4H) 3.96 (m, 1H) 4.07 (m, 1H) 5.31 (d, J=10.67 Hz, 1H) 5.52 (br s, 1H) 5.55 (d, J=9.79 Hz, 1H) 5.85 (br s, 1H) 5.83-5.91 (m, 2H) 6.11 (d, J=15.06 Hz, 1H) 6.34 (dd, J=15.06, 9.66 Hz, 1H) 6.41 (d, J=11.7 Hz, 1H) 6.43 (br s, 1H) 6.95 (dd, J=15.12, 11.11 Hz, 1H)

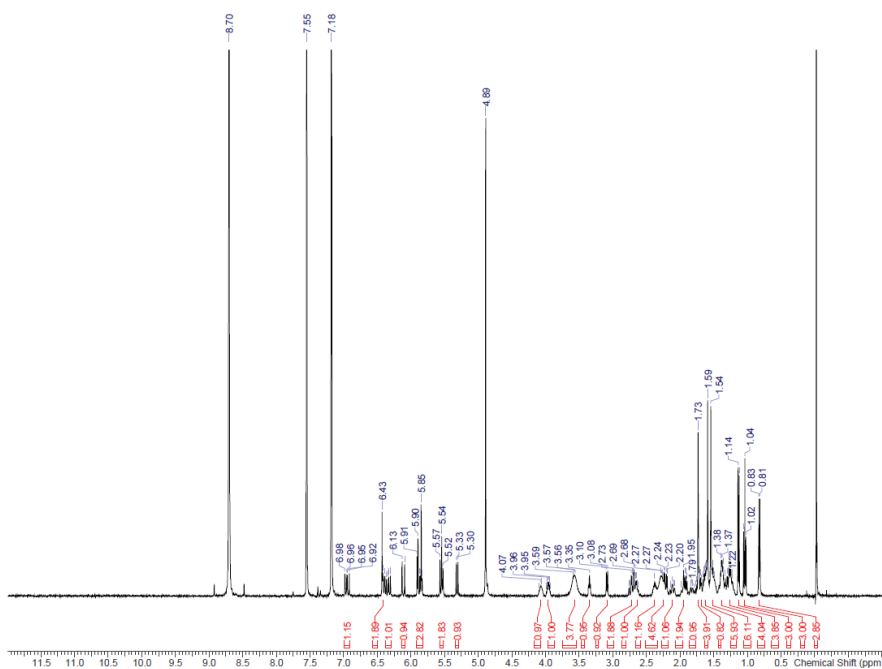

**Supplementary Figure 16:** Purity and Identity of compounds used in the study. LCMS profile (top) and <sup>1</sup>H-NMR spectra (bottom) of E7107 are shown. The first peak in the LCMS at 0.2 min corresponds to the solvent front and is omitted from the integration. The main peak in the mass spec shows the expected mass for the compound. The NMR spectra is annotated with the chemical shifts (blue font) and the number of protons integrated (red font). The large peaks with no integration correspond to solvent peaks.

## Herboxidiene: LC/MS, Purity: 100%

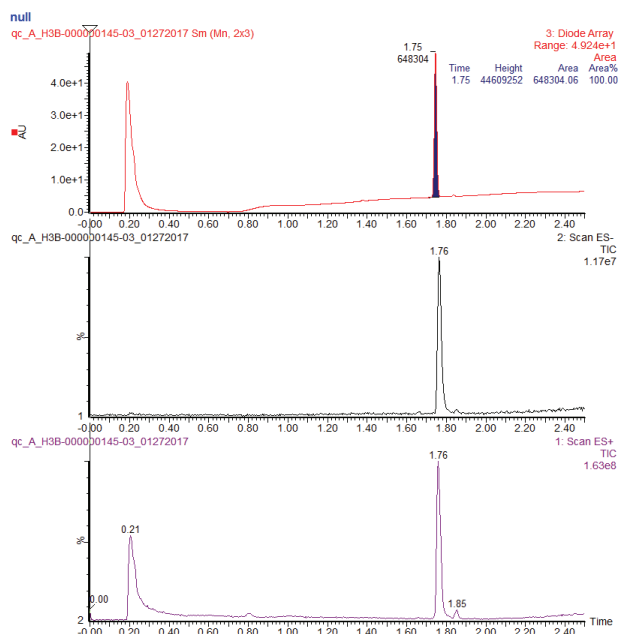

## Herboxidiene: MS $C_{25}H_{42}O_6$ Calculated 461.30 (M+Na)<sup>+</sup>. Actual 461.33

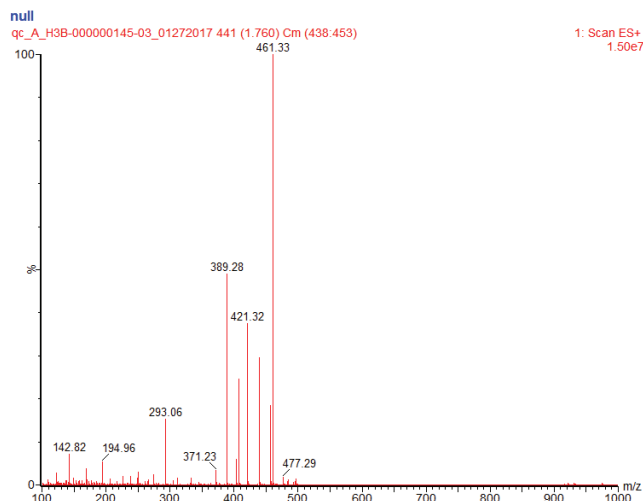

## Herboxidiene: 1H-NMR

<sup>1</sup>H NMR (400 MHz, CD<sub>3</sub>OD)  $\delta$  0.69(d,  $J=6.53$  Hz, 3H) 0.84(d,  $J=7.03$  Hz, 3H) 1.05(d,  $J=6.65$  Hz, 3H) 1.11(d,  $J=6.40$  Hz, 3H) 1.14 - 1.27(m, 2H) 1.28(s, 3H) 1.29 - 1.41(m, 1H) 1.45 - 1.60(m, 2H) 1.70(d,  $J=1.13$  Hz, 3H) 1.70 - 1.75(m, 1H) 1.82 - 1.90(m, 1H) 1.93(dd,  $J=13.43, 4.27$  Hz, 1H) 2.40(dd,  $J=15.31, 5.77$  Hz, 1H) 2.42 - 2.51(m, 1H) 2.48(dd,  $J=15.31, 7.28$  Hz, 1H) 2.66(d,  $J=9.41$  Hz, 1H) 2.98(dd,  $J=6.27, 4.27$  Hz, 1H) 3.33 - 3.39(m, 1H) 3.53(s, 3H) 3.72 - 3.85 (m, 2H) 5.48(dd,  $J=15.00, 9.10$  Hz, 1H) 5.92(d,  $J=10.79$  Hz, 1H) 6.30(dd,  $J=15.06, 10.79$  Hz, 1H)

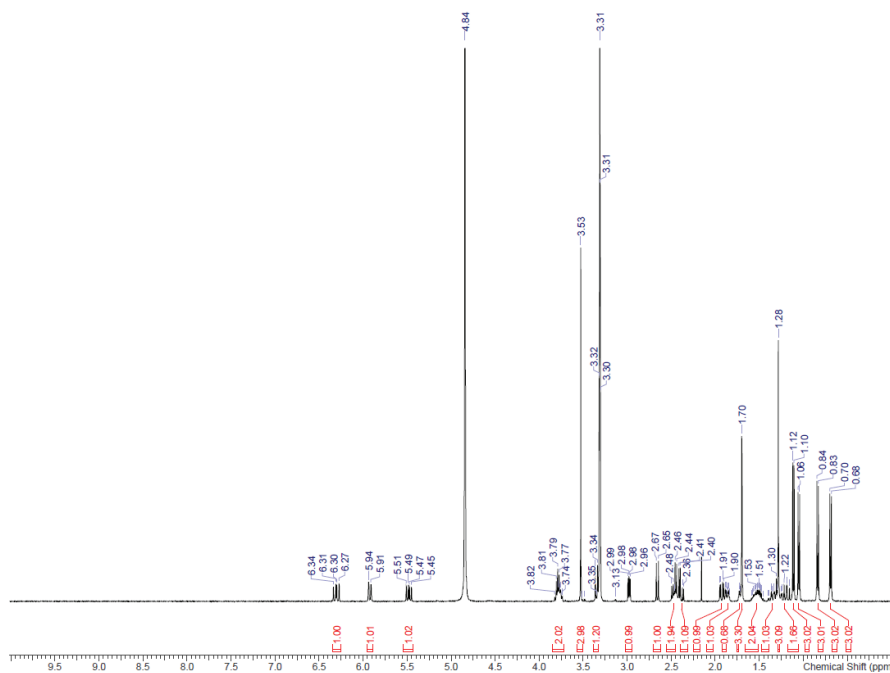

**Supplementary Figure 16:** Purity and Identity of compounds used in the study (continued). LCMS profile (top) and <sup>1</sup>H-NMR spectra (bottom) of Herboxidiene are shown. The first peak in the LCMS at 0.2 min corresponds to the solvent front and is omitted from the integration. The main peak in the mass spec shows the expected mass for the compound. The NMR spectra is annotated with the chemical shifts (blue font) and the number of protons integrated (red font). The large peaks with no integration correspond to solvent peaks.

## Spliceostatin A: LC/MS, Purity: 96.4%

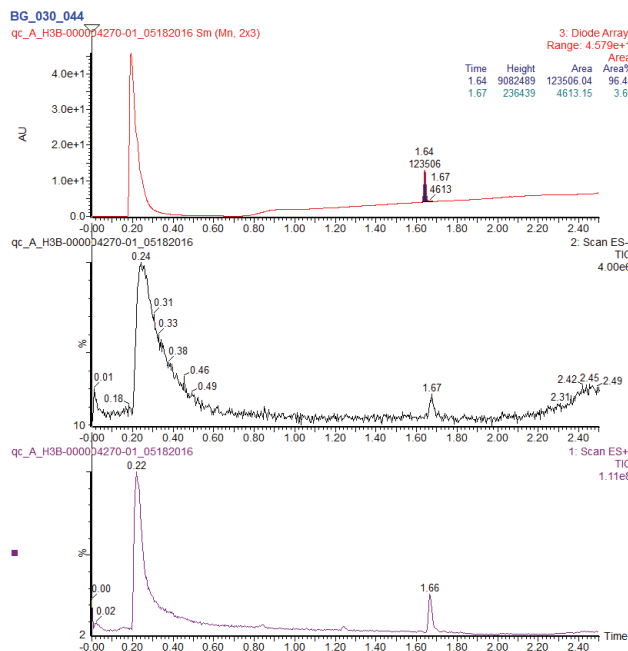

## Spliceostatin A: MS $C_{28}H_{43}NO_8$ Calculated 544.30 (M+Na)<sup>+</sup>. Actual 544.48.

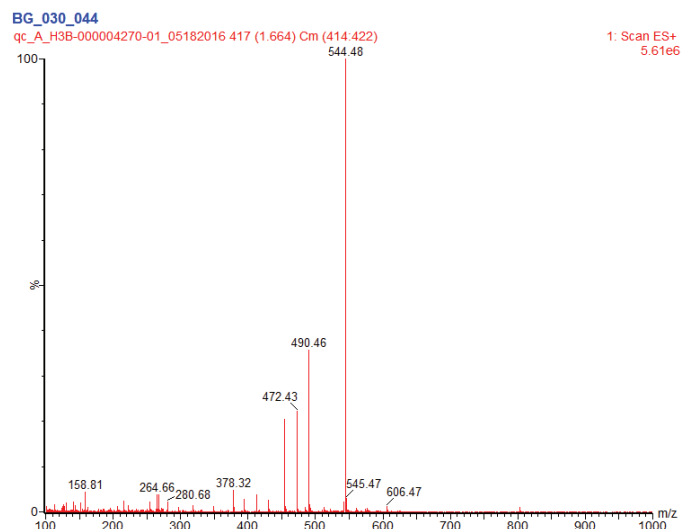

## Spliceostatin A: 1H-NMR

**<sup>1</sup>H NMR** (400 MHz, CDCl<sub>3</sub>) δ 1.02 (d, J=7.40 Hz, 3H) 1.15 (d, J=6.53 Hz, 3H) 1.38-1.40 (m, 6H) 1.68-1.76 (m, 3H) 1.79 (s, 3H) 1.91-1.94 (m, 2H) 2.04 (s, 3H) 2.18 - 2.43 (m, 3H) 2.49 (d, J=4.64 Hz, 1H) 2.99 (d, J=4.64 Hz, 1H) 3.28 (s, 3H) 3.50-3.54 (m, 1H) 3.58-3.63 (m, 1H) 3.69-3.64 (m, 1H) 3.91-3.98 (m, 1H) 4.05 (m, 1H) 5.51 (t, J=7.03 Hz, 1H) 5.66-5.76 (m, 2H) 5.89 (dd, J=11.54, 7.91 Hz, 1H) 5.99 (d, J=9.16 Hz, 1H) 6.22-6.30 (m, 1H) 6.40 (d, J=15.69 Hz, 1H)

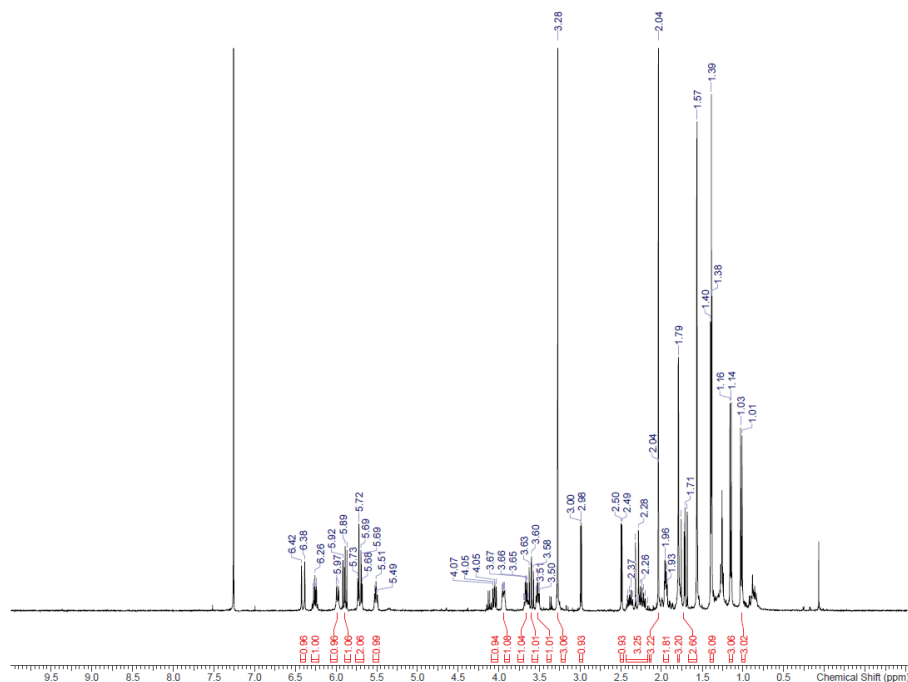

**Supplementary Figure 16:** Purity and Identity of compounds used in the study (continued). LCMS profile (top) and <sup>1</sup>H-NMR spectra (bottom) of Spliceostatin A are shown. The first peak in the LCMS at 0.2 min corresponds to the solvent front and is omitted from the integration. The main peak in the mass spec shows the expected mass for the compound. The NMR spectra is annotated with the chemical shifts (blue font) and the number of protons integrated (red font). The large peaks with no integration correspond to solvent peaks.



## Sudemycin D6: LC/MS, Purity: 100%

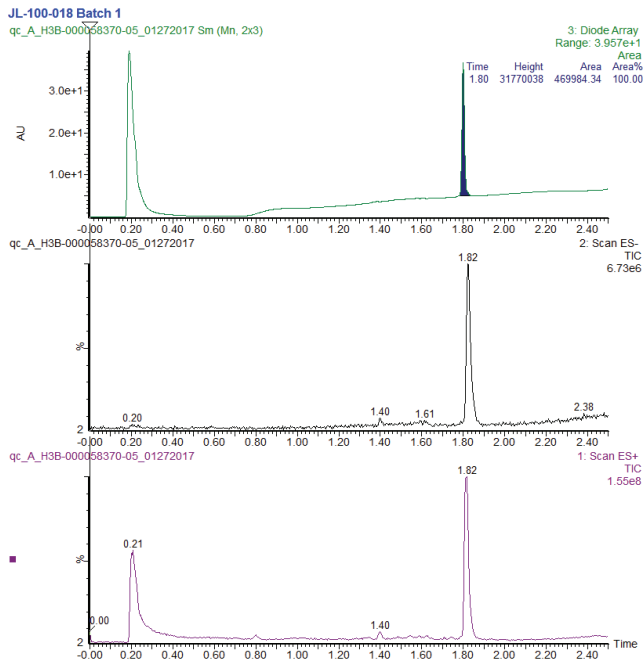

**Sudemycin D6: MS**  $C_{27}H_{42}N_2O_5$   
Calculated 475.31 (M+H)<sup>+</sup>, 497.31 (M+Na)<sup>+</sup>.  
Actual 475.36, 497.40.

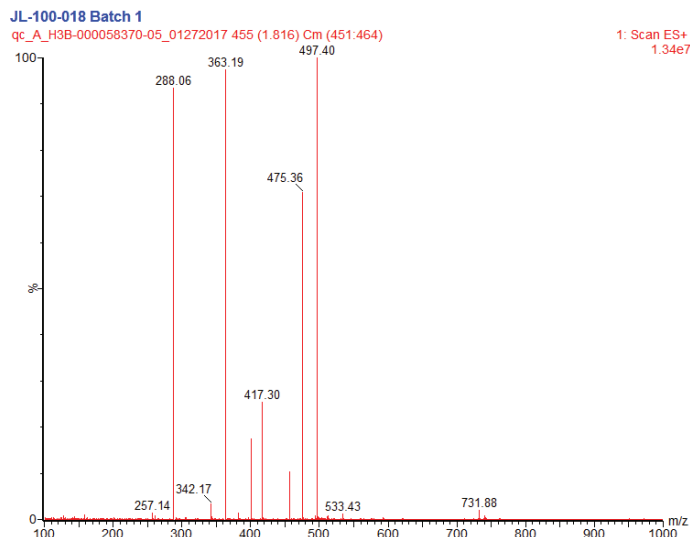

## Sudemycin D6: 1H-NMR

**<sup>1</sup>H NMR** <sup>1</sup>H NMR (400 MHz, CDCl<sub>3</sub>) δ ppm 1.14-1.24 (m, 2 H) 1.28 (s, 3H) 1.31 (d, J= 5.90 Hz, 3H) 1.35-1.38 (m, 2H) 1.40 (s, 3H) 1.44-1.48 (m, 1H) 1.59-1.63 (m, 4H) 1.6-1.81 (m, 5H) 1.89- 2.02 (m, 2H) 2.10 (br t, J=7.09 Hz, 2H) 2.57 (s, 2H) 2.79 (d, J=4.89 Hz, 3H) 4.12 (m, 1H) 4.44-4.49 (m, 1 H) 4.74 (m, 1 H) 5.48 - 5.65 (m, 4 H) 5.82 (d, J=10.92 Hz, 1H) 6.27 (d, J=15.69 Hz, 1H) 7.94 (br d, J=7.28 Hz, 1H)

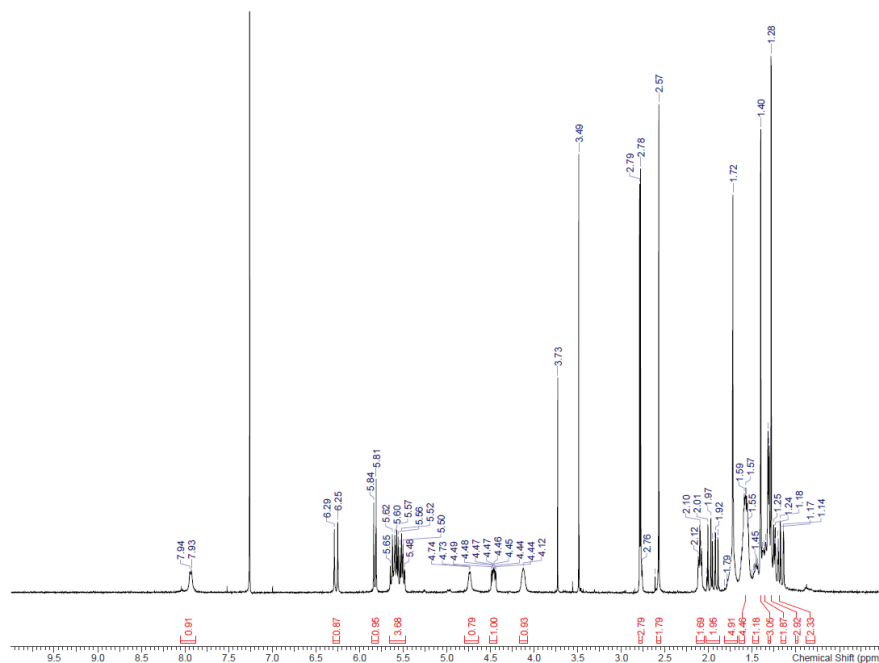

**Supplementary Figure 16:** Purity and Identity of compounds used in the study (continued). LCMS profile (top) and <sup>1</sup>H-NMR spectra (bottom) of Sudemycin D6 are shown. The first peak in the LCMS at 0.2 min corresponds to the solvent front and is omitted from the integration. The main peak in the mass spec shows the expected mass for the compound. The NMR spectra is annotated with the chemical shifts (blue font) and the number of protons integrated (red font). The large peaks with no integration correspond to solvent peaks. Two peaks at delta 3.49 and 3.73 correspond to the two solvents (methanol and 1,2-dichloroethane, respectively) that were used to transfer the material.



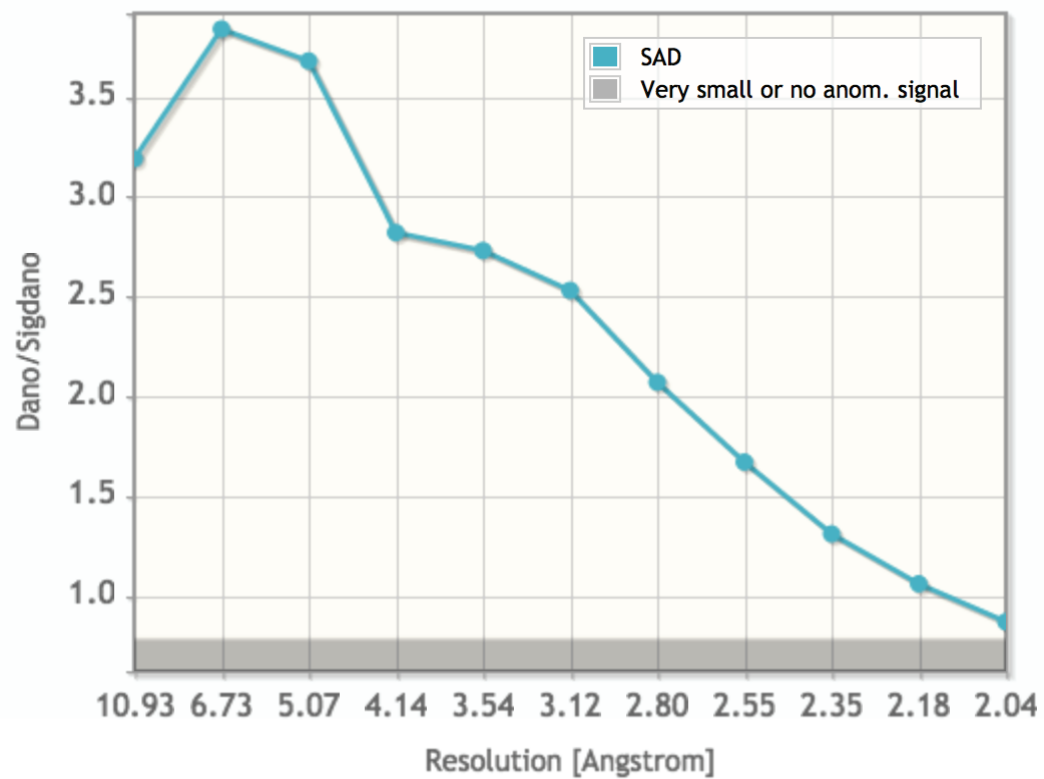

**Supplementary Figure 17:** Anomalous signal versus resolution. a cutoff for SAD resolution is that  $\text{Dano/SigDano} > 0.5$  and a more stringent cutoff would be  $> 1.2$ , indicating the anomalous signal for this dataset is 2.04 or 2.35 Å.

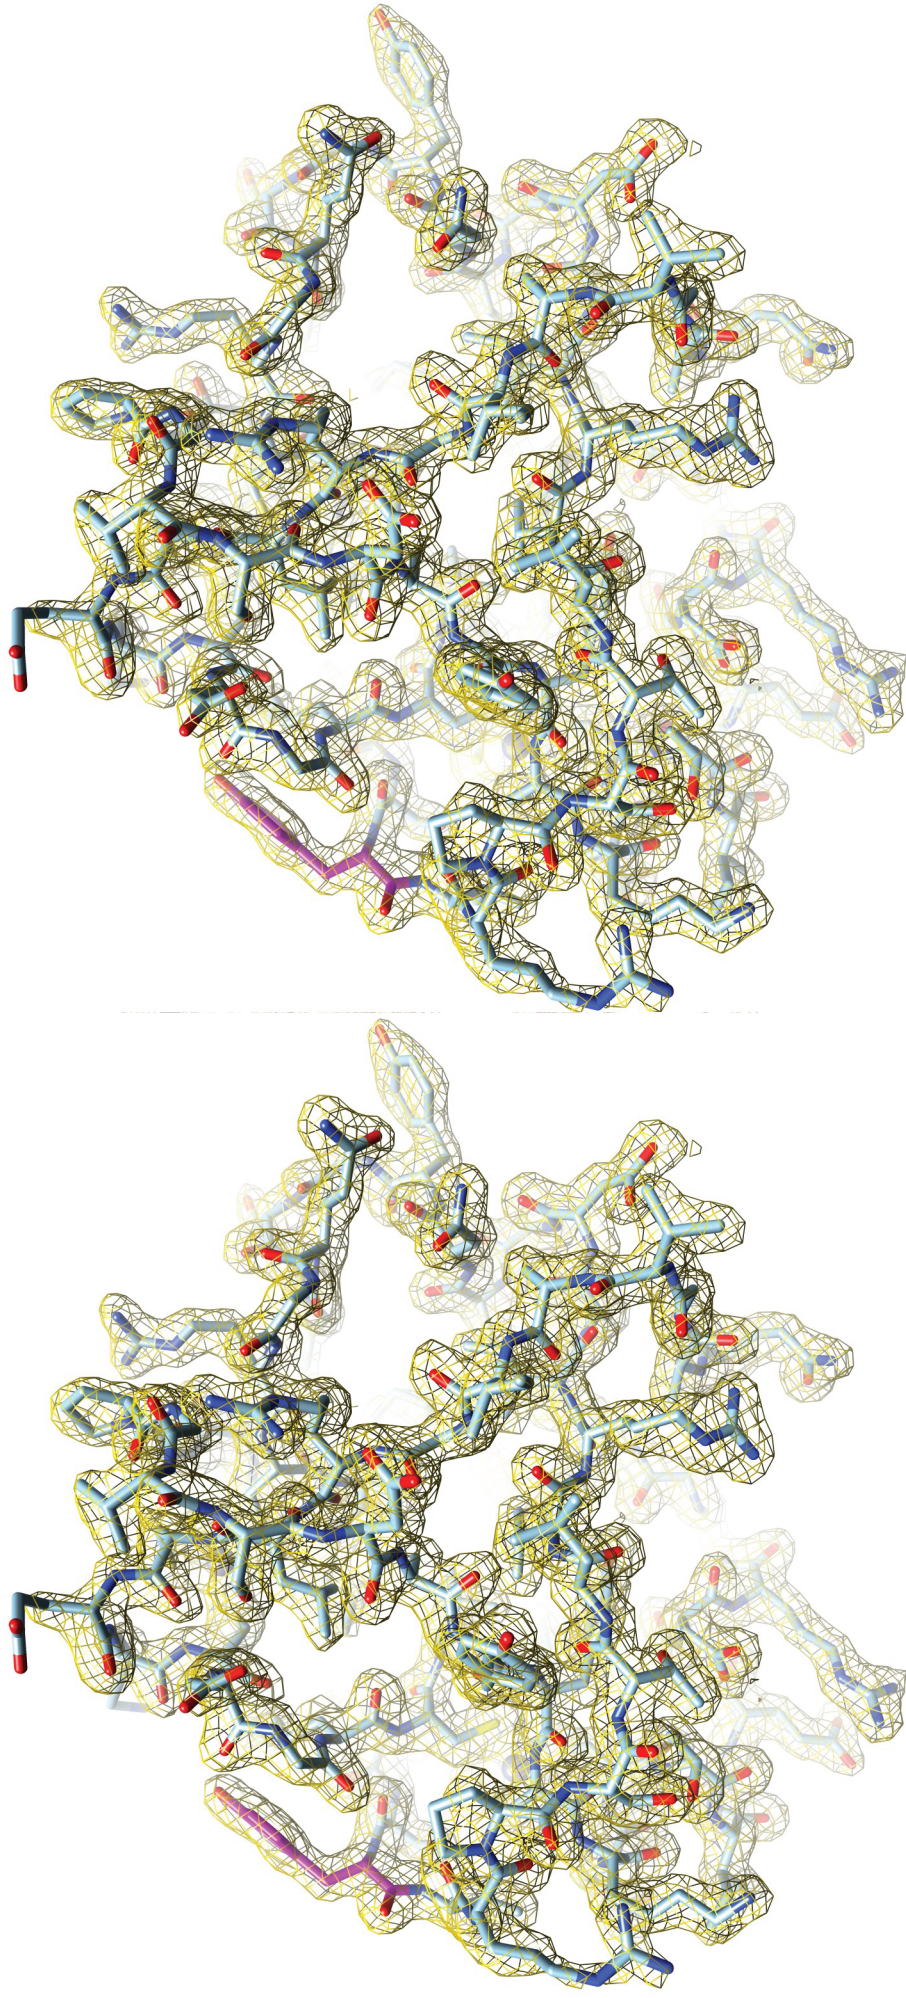

**Supplementary Figure 18:** Stereo view of PHF5A showing representative electron density from the final refined 2Fo-Fc map contoured at 1 sigma. Tyrosine 36 is highlighted in magenta. For clarity, waters were omitted from the map calculation. The figure was generated using the program Chimera.

## Supplementary Table 1: Primer and Probe Sequences

### Taqman Gene Expression Primer and Probe Sequences

|                                              |                                            |
|----------------------------------------------|--------------------------------------------|
| <b><i>MCL1-L</i> probe set</b>               |                                            |
| Forward Primer                               | ATATGCCAAACCAGCTCCTAC                      |
| Probe                                        | AGAACTCCACAAACCCATCCCAGC                   |
| Reverse Primer                               | AAGGACAAAACGGGACTGG                        |
| <b><i>MCL1-S</i> probe set</b>               |                                            |
| Forward Primer                               | AAAGCCAATGGGCAGGT                          |
| Probe                                        | TCCACAAACCCATCTTGAAGGCC                    |
| Reverse Primer                               | CCACCTTCTAGGTCCTCTACAT                     |
| <b><i>MCL1</i> intron1 probe set</b>         |                                            |
| Forward Primer                               | GACAAAGGAGGCCGTGAGGA                       |
| Probe                                        | GTTTGTTACGCCGTCGCTGAAA                     |
| Reverse Primer                               | TCAGGCATGCTTCGGAAACTGGA                    |
| <b><i>MCL1</i> intron2 probe set</b>         |                                            |
| Forward Primer                               | GCCCCGGGGTGAATAATAATTGGTTTACT              |
| Probe                                        | TTTCTAGGATGGGTTTGTGGAGTT                   |
| Reverse Primer                               | CCTGATGCCACCTTCTAGGTCCTCTAC                |
| <b>pan <i>MCL1</i> probe set</b>             |                                            |
| Forward Primer                               | GCCAAGGACACAAAGCCAAT                       |
| Probe                                        | CTGGAGACCTTACGACGGGTTGGG                   |
| Reverse Primer                               | AAGGCCGTCTCGTGGTT                          |
| <b><i>SLC25A19</i> mature form probe set</b> | Life Technologies Assay ID = Hs00222265_m1 |
| <b><i>EIF4A1</i> pre-mRNA form probe set</b> | Life Technologies Assay ID = AJRR9DL       |
| <b>AD2 probe set</b>                         |                                            |
| Forward Primer                               | ACTCTCTCCGCATCGCTGT                        |
| Probe                                        | CTGTTGGGCTCGCGGTTG                         |

|                      |                      |
|----------------------|----------------------|
| Reverse Primer       | CCGACGGGTTTCCGATCCAA |
| <b>FTZ probe set</b> |                      |
| Forward Primer       | TGGCATCAGATTGCAAAGAC |
| Probe                | CGAAACGCACCCGTCAGACG |
| Reverse Primer       | ACGCCGGGTGATGTATCTAT |

### Site-Directed Mutagenesis Primer Sequences

|                   |                                                |
|-------------------|------------------------------------------------|
| <b>PHF5A Y36C</b> |                                                |
| Forward Primer    | GTGTGTGATTTGTGACTCCTGTGTGCGTCCCTGCACTCT<br>GG  |
| Reverse Primer    | CCAGAGTGCAGGGACGCACACAGGAGTCACAAATCACAC<br>CAC |
| <b>PHF5A Y36A</b> |                                                |
| Forward Primer    | GAGTGCAGGGACGCACAGCGGAGTCACAAATCACAC           |
| Reverse Primer    | GTGTGATTTGTGACTCCGCTGTGCGTCCCTGCACTC           |
| <b>PHF5A Y36E</b> |                                                |
| Forward Primer    | AGAGTGCAGGGACGCACCTCGGAGTCACAAATCACAC          |
| Reverse Primer    | GTGTGATTTGTGACTCCGAGGTGCGTCCCTGCACTCT          |
| <b>PHF5A Y36F</b> |                                                |
| Forward Primer    | AGAGTGCAGGGACGCACGAAGGAGTCACAAATCACAC          |
| Reverse Primer    | GTGTGATTTGTGACTCCTTCGTGCGTCCCTGCACTCT          |
| <b>PHF5A Y36R</b> |                                                |
| Forward Primer    | GAGTGCAGGGACGCACACGGGAGTCACAAATCACAC           |
| Reverse Primer    | GTGTGATTTGTGACTCCCGTGTGCGTCCCTGCACTC           |
| <b>PHF5A Y36S</b> |                                                |
| Forward Primer    | CCAGAGTGCAGGGACGCACGCTGGAGTCACAAATCACAC<br>CAC |

|                   |                                                   |
|-------------------|---------------------------------------------------|
| Reverse Primer    | GTGTGTGATTTGTGACTCCAGCGTGCGTCCCTGCACTCT<br>GG     |
| <b>PHF5A Y36W</b> |                                                   |
| Forward Primer    | AGAGTGCAGGGACGCACCCAGGAGTCACAAATCACAC             |
| Reverse Primer    | GTGTGATTTGTGACTCCTGGGTGCGTCCCTGCACTCT             |
| <b>PHF5A V37C</b> |                                                   |
| Forward Primer    | CCAGAGTGCAGGGACGGCAATAGGAGTCACAAATCACAC<br>CACTTG |
| Reverse Primer    | CAAGTGTGTGATTTGTGACTCCTATTGCCGTCCCTGCAC<br>TCTGG  |
